# Supplementary material for: Of perfluorinated aryllead( ii ) complexes
Source: Royal Society of Chemistry journal article supplement (doi:10.1039/d4dt03167a), 2024-12-09
Supplement: d4dt03167a1.pdf [file d4dt03167a1.pdf]

## Electronic Supporting Information for

## Of perfluorinated aryllead(II) complexes

Adrian-Alexandru Someșan,<sup>\*a</sup> Thierry Roisnel<sup>b</sup> and Yann Sarazin <sup>\*b</sup>

Univ Rennes, CNRS, ISCR (Institut des Sciences Chimiques de Rennes) – UMR 6226, F-35000 Rennes, France.

Corresponding author: [yann.sarazin@univ-rennes.fr](mailto:yann.sarazin@univ-rennes.fr)

<sup>a</sup> Supramolecular Organic and Organometallic Chemistry Centre,  
Chemistry Department, Faculty of Chemistry and Chemical Engineering,  
Babes-Bolyai University, RO-400028 Cluj-Napoca, Romania.  
E-mail: [adrian.somesan@ubbcluj.ro](mailto:adrian.somesan@ubbcluj.ro); Tel: (+40) 264-593833

<sup>b</sup> Univ Rennes, CNRS, ISCR (Institut des Sciences Chimiques de Rennes) – UMR 6226, F-35000 Rennes, France.  
E-mail: [yann.sarazin@univ-rennes.fr](mailto:yann.sarazin@univ-rennes.fr); Tel: (+33) 2 23 23 30 19.

# Contents

| <i>Contents</i>                                                                                                                                                                                                                                                                                                                           | <i>pages</i> |
|-------------------------------------------------------------------------------------------------------------------------------------------------------------------------------------------------------------------------------------------------------------------------------------------------------------------------------------------|--------------|
| <b>Experimental section</b>                                                                                                                                                                                                                                                                                                               |              |
| <b>General procedures</b>                                                                                                                                                                                                                                                                                                                 | p. S3        |
| Synthesis of $[\text{Mg}_3(\mu_2\text{-Br})_3(\mu_3\text{-Cl})_2(\text{OEt}_2)_6]^+[\text{Pb}(\text{C}_6\text{F}_5)_3]^-$ ( <b>1</b> )                                                                                                                                                                                                    | p. S4        |
| <b>Figure S1.</b> $^1\text{H}$ NMR spectrum (THF- <i>d</i> <sub>8</sub> , 500.13 MHz, 300 K) of <b>1</b>                                                                                                                                                                                                                                  | p. S5        |
| <b>Figure S2.</b> $^{13}\text{C}\{^1\text{H}\}$ NMR spectrum (THF- <i>d</i> <sub>8</sub> , 125.77 MHz, 300 K) of <b>1</b>                                                                                                                                                                                                                 | p. S6        |
| <b>Figure S3.</b> $^{19}\text{F}$ NMR spectrum (THF- <i>d</i> <sub>8</sub> , 470.52 MHz, 300 K) of <b>1</b>                                                                                                                                                                                                                               | p. S7        |
| <b>Figure S4.</b> $^{207}\text{Pb}\{^1\text{H}\}$ NMR spectrum (THF- <i>d</i> <sub>8</sub> , 83.79 MHz, 300 K) of <b>1</b>                                                                                                                                                                                                                | p. S8        |
| <b>Figure S5.</b> Stacked $^{19}\text{F}$ NMR spectra (THF- <i>d</i> <sub>8</sub> , 376.47 MHz, 300 K) of the reaction between $\text{C}_6\text{F}_5\text{MgBr}$ and $\text{PbBr}_2$ (2:1 molar ratio) with the formation of $[\text{Mg}_3(\mu_2\text{-Br})_3(\mu_3\text{-Br})_2(\text{OEt}_2)_6]^+[\text{Pb}(\text{C}_6\text{F}_5)_3]^-$ | p. S9        |
| <b>Figure S6.</b> $^{19}\text{F}$ NMR spectrum (THF- <i>d</i> <sub>8</sub> , 376.47 MHz, 300 K) of crystalline $[\text{Pb}(\text{C}_6\text{F}_5)_4]$                                                                                                                                                                                      | p. S10       |
| Synthesis of $[\text{Pb}(\text{C}_6\text{F}_5)_2(\text{dx})]_\infty$ ( <b>2</b> )                                                                                                                                                                                                                                                         | p. S11       |
| <b>Figure S7.</b> $^1\text{H}$ NMR spectrum (THF- <i>d</i> <sub>8</sub> , 500.13 MHz, 300 K) of <b>2</b>                                                                                                                                                                                                                                  | p. S12       |
| <b>Figure S8.</b> $^{13}\text{C}\{^1\text{H}\}$ NMR spectrum (THF- <i>d</i> <sub>8</sub> , 125.77 MHz, 300 K) of <b>2</b>                                                                                                                                                                                                                 | p. S13       |
| <b>Figure S9.</b> $^{19}\text{F}$ NMR spectrum (THF- <i>d</i> <sub>8</sub> , 470.52 MHz, 300 K) of <b>2</b>                                                                                                                                                                                                                               | p. S14       |
| <b>Figure S10.</b> $^{207}\text{Pb}\{^1\text{H}\}$ NMR spectrum (THF- <i>d</i> <sub>8</sub> , 83.92 MHz, 300 K) of <b>2</b>                                                                                                                                                                                                               | p. S15       |
| Synthesis of $[(\text{C}_5\text{F}_5)_3\text{SnSn}(\text{C}_6\text{F}_5)_3]$ ( <b>3</b> )                                                                                                                                                                                                                                                 | p. S16       |
| <b>Figure S11.</b> $^{13}\text{C}\{^1\text{H}\}$ NMR spectrum (THF- <i>d</i> <sub>8</sub> , 100.62 MHz, 300 K) of <b>3</b>                                                                                                                                                                                                                | p. S17       |
| <b>Figure S12.</b> $^{19}\text{F}$ NMR spectrum (THF- <i>d</i> <sub>8</sub> , 376.44 MHz, 300 K) of <b>3</b>                                                                                                                                                                                                                              | p. S18       |
| <b>Figure S13.</b> $^{119}\text{Sn}\{^1\text{H}\}$ NMR spectrum (THF- <i>d</i> <sub>8</sub> , 149.14 MHz, 300 K) of <b>3</b>                                                                                                                                                                                                              | p. S19       |
| <b>Figure S14.</b> $^{19}\text{F}$ NMR spectrum ( $\text{CDCl}_3$ , 300 K, 376.47 MHz) of <b>3</b>                                                                                                                                                                                                                                        | p. S20       |
| X-ray diffraction crystallography                                                                                                                                                                                                                                                                                                         | pp. S21-S23  |
| <b>Table S1.</b> Crystal data and structure refinement for <b>1</b> and <b>2</b>                                                                                                                                                                                                                                                          | p. S24       |
| <b>Table S2.</b> Crystal data and structure refinement for $[\text{Pb}(\text{C}_6\text{F}_5)_4]$ , $[(\text{C}_5\text{F}_5)_3\text{SnSn}(\text{C}_6\text{F}_5)_3]\cdot(\text{dx})$ and $[\text{MgBr}_2(\text{DMAP})_2]$                                                                                                                   | p. S25       |
| <b>Table S3.</b> Selected interatomic distances and bond angles of <b>1</b>                                                                                                                                                                                                                                                               | p. S26       |
| <b>Figure S16.</b> ORTEP representation of the new polymorph structure of $[\text{Pb}(\text{C}_6\text{F}_5)_4]$                                                                                                                                                                                                                           | p. S27       |
| <b>Figure S17.</b> Intermolecular C–H···F contacts in the crystal of <b>2</b>                                                                                                                                                                                                                                                             | p. S28       |
| <b>Figure S18.</b> View along <i>b</i> axis of the polymer structure of <b>2</b>                                                                                                                                                                                                                                                          | p. S29       |
| <b>Figure S19.</b> ORTEP representation of the molecular structure of $[(\text{C}_5\text{F}_5)_3\text{SnSn}(\text{C}_6\text{F}_5)_3]\cdot(\text{dx})$                                                                                                                                                                                     | p. S30       |
| <b>Figure S20.</b> ORTEP representation of the molecular structure of $[\text{MgBr}_2(\text{DMAP})_2]$                                                                                                                                                                                                                                    | p. S31       |
| References                                                                                                                                                                                                                                                                                                                                | p. S32       |

## Experimental section

### General procedures

All manipulations were performed under an inert atmosphere using standard Schlenk techniques or in a dry, solvent-free glovebox (Jacomex; O<sub>2</sub> < 1 ppm, H<sub>2</sub>O < 5 ppm) for catalyst loading. Solvents (THF, Et<sub>2</sub>O, petroleum ether and toluene) were purified and dried (water contents below 8 ppm) over columns of alumina (MBraun SPS). THF was further distilled under argon from sodium mirror/benzophenone ketyl. All deuterated solvents (Eurisotop, Saclay, France) were stored in sealed ampules over activated 3 Å molecular sieves and were thoroughly degassed by several freeze-thaw vacuum cycles.

NMR spectra were recorded on Bruker AM-400 or AM-500 spectrometers. All <sup>1</sup>H and <sup>13</sup>C{<sup>1</sup>H} chemical shifts (reported in ppm) were determined using residual signals of the deuterated solvents and were calibrated vs SiMe<sub>4</sub>. Assignment of the signals was carried out using 1D (<sup>1</sup>H, <sup>13</sup>C{<sup>1</sup>H}) and 2D (COSY, HMBC, HSQC) NMR experiments. <sup>207</sup>Pb NMR spectra were referenced against a solution of Pb[N(SiMe<sub>3</sub>)<sub>2</sub>]<sub>2</sub><sup>[1]</sup> in benzene-d<sub>6</sub> (δ<sup>207</sup>Pb = 4916 ppm at 298 K). <sup>19</sup>F chemical shifts were determined by external reference to an aqueous solution of NaBF<sub>4</sub>. <sup>119</sup>Sn NMR spectra were referenced against a solution of Ph<sub>3</sub>SnCl in CDCl<sub>3</sub> (δ<sup>119</sup>Sn = -44.7 ppm at 298 K)<sup>[2]</sup>.

Owing to the very sensitive nature of the new complexes **1** and **2**, we were unable to obtain reproducible and reliable elemental and mass spectrometry analysis for these two complexes.

### Synthesis of $[\text{Mg}_3(\mu_2\text{-Br})_3(\mu_3\text{-Cl})_2(\text{OEt}_2)_6]^+[\text{Pb}(\text{C}_6\text{F}_5)_3]^-$ (**1**)

A dark-brown solution of  $\text{C}_6\text{F}_5\text{MgBr}$  in  $\text{Et}_2\text{O}$  (2.978 g, 19.0 mL, 0.58 M, 10.98 mmol) was added dropwise, for 20 minutes, to a slurry of  $\text{PbCl}_2$  (1.527 g, 5.49 mmol) in  $\text{Et}_2\text{O}$  (35 mL) at  $-60\text{ }^\circ\text{C}$ , avoiding light. After 4 h, the reaction mixture had reached room temperature and the orange-brown solution was separated from the precipitate by cannula filtration, concentrated to half of its initial volume and stored at  $-35\text{ }^\circ\text{C}$ . The title compound was isolated as a pale brown crystalline solid, 1.400 g (25%).

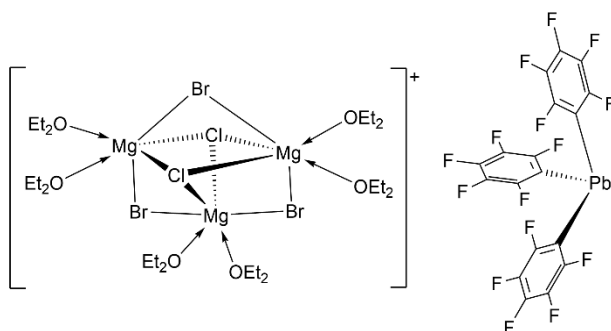

$^1\text{H}$  NMR ( $\text{THF-}d_8$ , 500.13 MHz, 300 K):  $\delta$  3.36 (q, 24H,  $^3J_{\text{H-H}} = 7.0$  Hz,  $\text{OCH}_2$ ), 1.09 (t, 36H,  $^3J_{\text{H-H}} = 7.0$  Hz,  $\text{CH}_3$ ) ppm.

$^{13}\text{C}\{^1\text{H}\}$  NMR ( $\text{THF-}d_8$ , 125.77 MHz, 300 K):  $\delta$  148.21 (ddm,  $^1J_{\text{F-C}} = 225$  Hz,  $^2J_{\text{F-C}} = 27$  Hz, *ortho-C*), 139.52 (dm,  $^1J_{\text{F-C}} = 243$  Hz, *para-C*), 137.64 (dm,  $^1J_{\text{F-C}} = 256$  Hz, *meta-C*), 102.24 (td,  $^2J_{\text{F-C}} = 24$  Hz,  $^3J_{\text{F-C}} = 3$  Hz, *ipso-C*), 66.31 (s,  $\text{CH}_2$ ), 15.69 (s,  $\text{CH}_3$ ) ppm.

$^{19}\text{F}$  NMR ( $\text{THF-}d_8$ , 470.52 MHz, 300 K):  $\delta$   $-113.44$  (m, 6F, *ortho-C* $_6\text{F}_5$ ),  $-161.52$  (t, 3F,  $^3J_{\text{F-F}} = 19.9$  Hz,  $^4J_{\text{F-Pb}} = 14.0$  Hz, *para-C* $_6\text{F}_5$ ),  $-163.73$  (m, 6F, *meta-C* $_6\text{F}_5$ ) ppm.

$^{207}\text{Pb}\{^1\text{H}\}$  NMR ( $\text{THF-}d_8$ , 83.88 MHz, 299 K):  $\delta$  1090 (br) ppm.

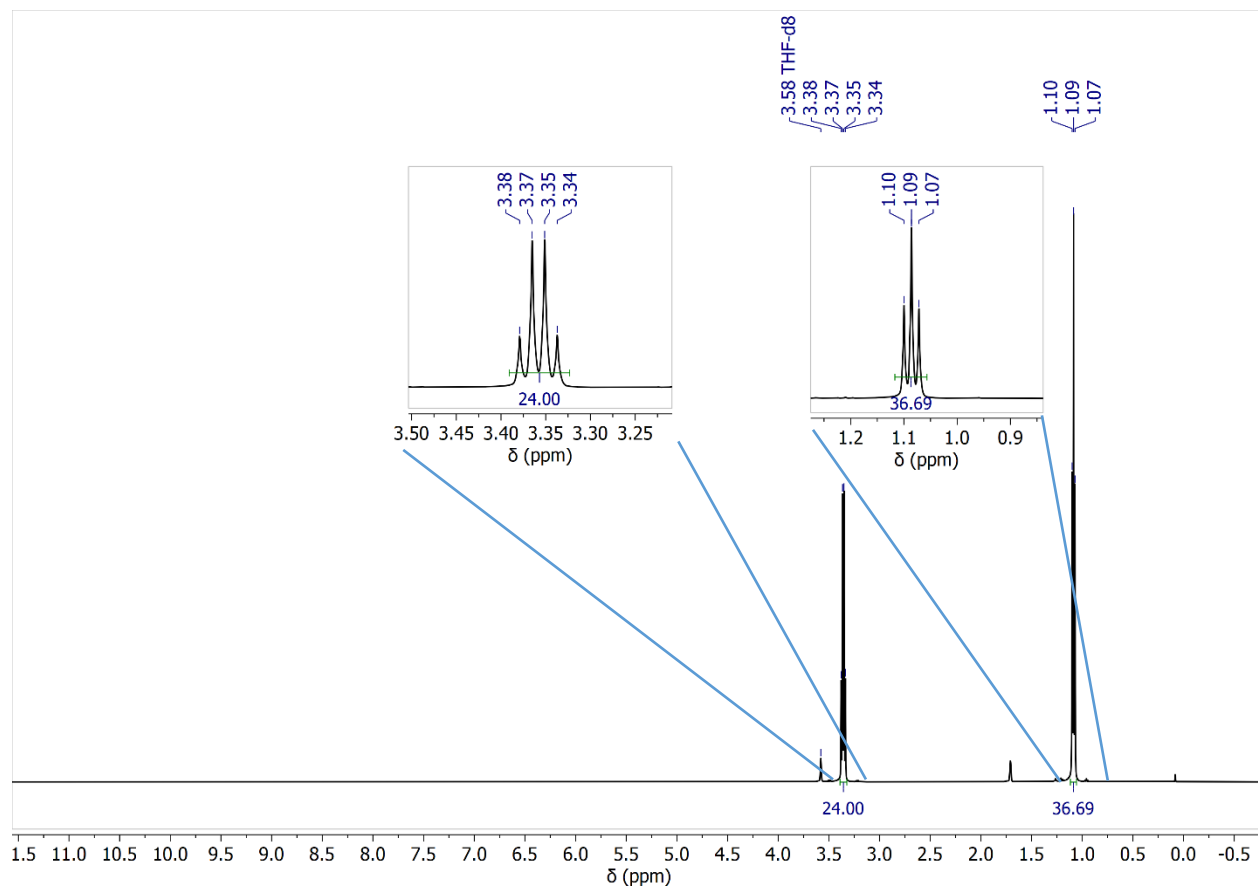

**Figure S1.**  $^1\text{H}$  NMR spectrum (THF- $d_8$ , 500.13 MHz, 300 K) of  $[\text{Mg}_3(\mu_2\text{-Br})_3(\mu_3\text{-Cl})_2(\text{OEt})_6]^+[\text{Pb}(\text{C}_6\text{F}_5)_3]^-$  (**1**).

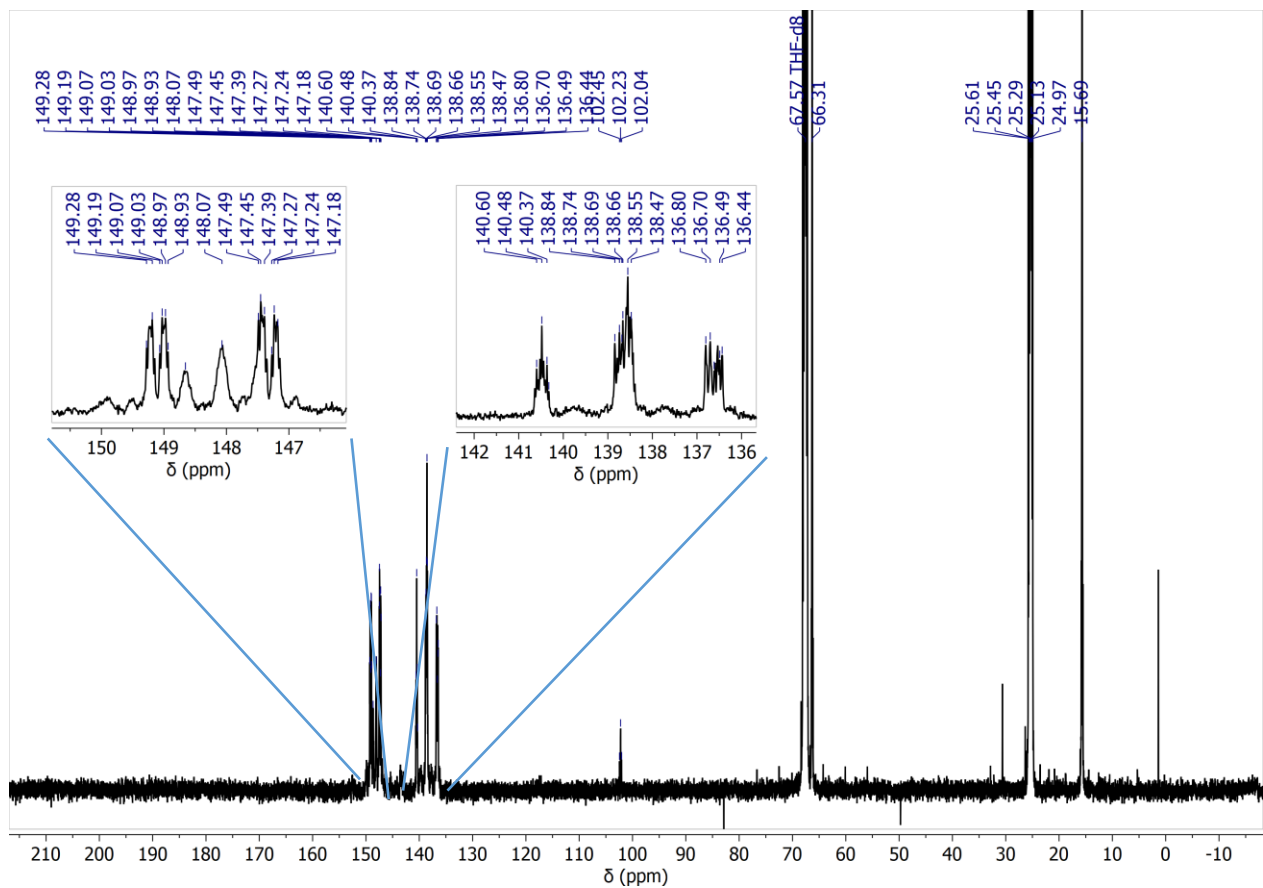

**Figure S2.**  $^{13}\text{C}\{^1\text{H}\}$  NMR spectrum ( $\text{THF-}d_8$ , 125.77 MHz, 300 K) of  $[\text{Mg}_3(\mu_2\text{-Br})_3(\mu_3\text{-Cl})_2(\text{OEt})_6]^+[\text{Pb}(\text{C}_6\text{F}_5)_3]^-$  (**1**).

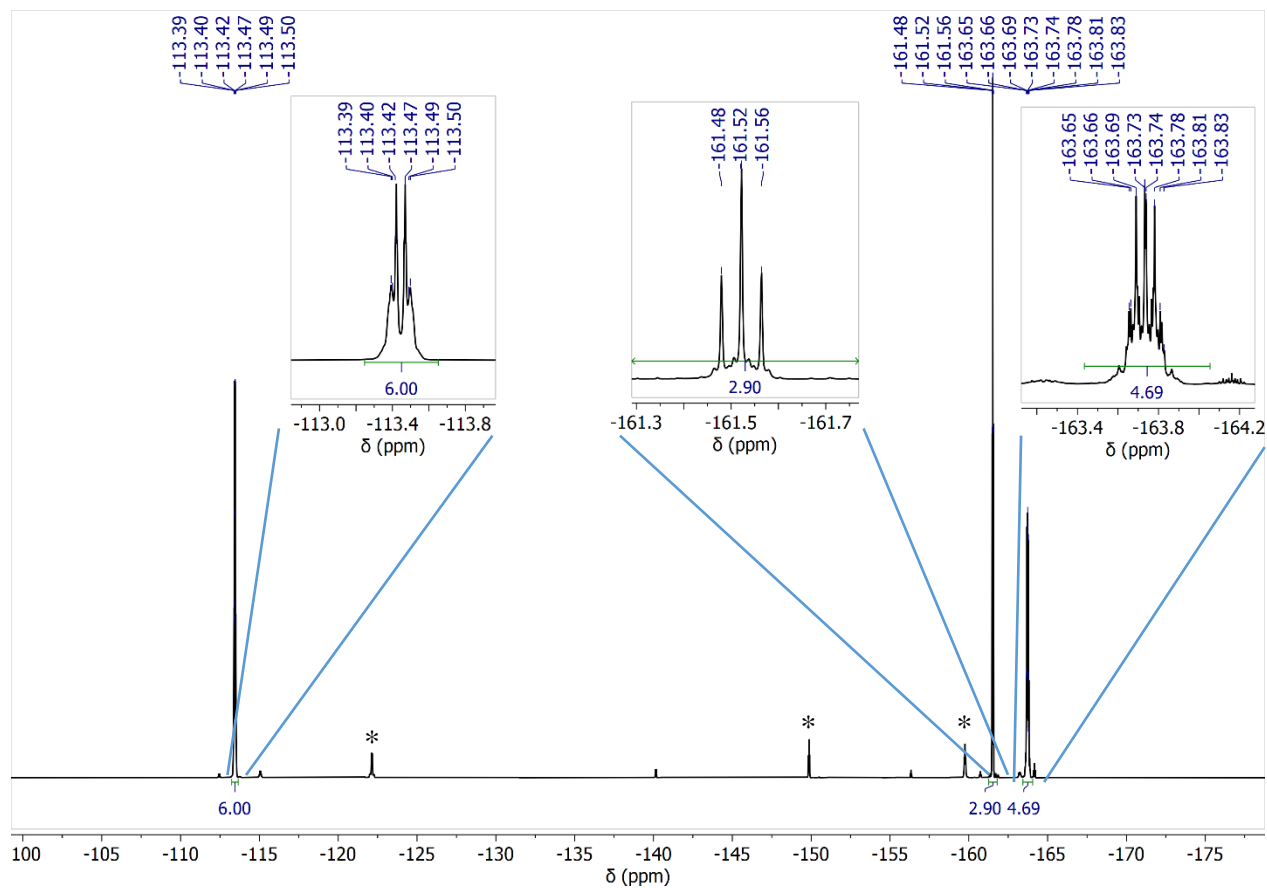

**Figure S3.**  $^{19}\text{F}$  NMR spectrum ( $\text{THF-}d_8$ , 470.52 MHz, 300 K) of  $[\text{Mg}_3(\mu_2\text{-Br})_3(\mu_3\text{-Cl})_2(\text{OEt}_2)_6]^+[\text{Pb}(\text{C}_6\text{F}_5)_3]^-$  (1). Resonances for residual  $\text{Pb}(\text{C}_6\text{F}_5)_4$  indicated by \*.

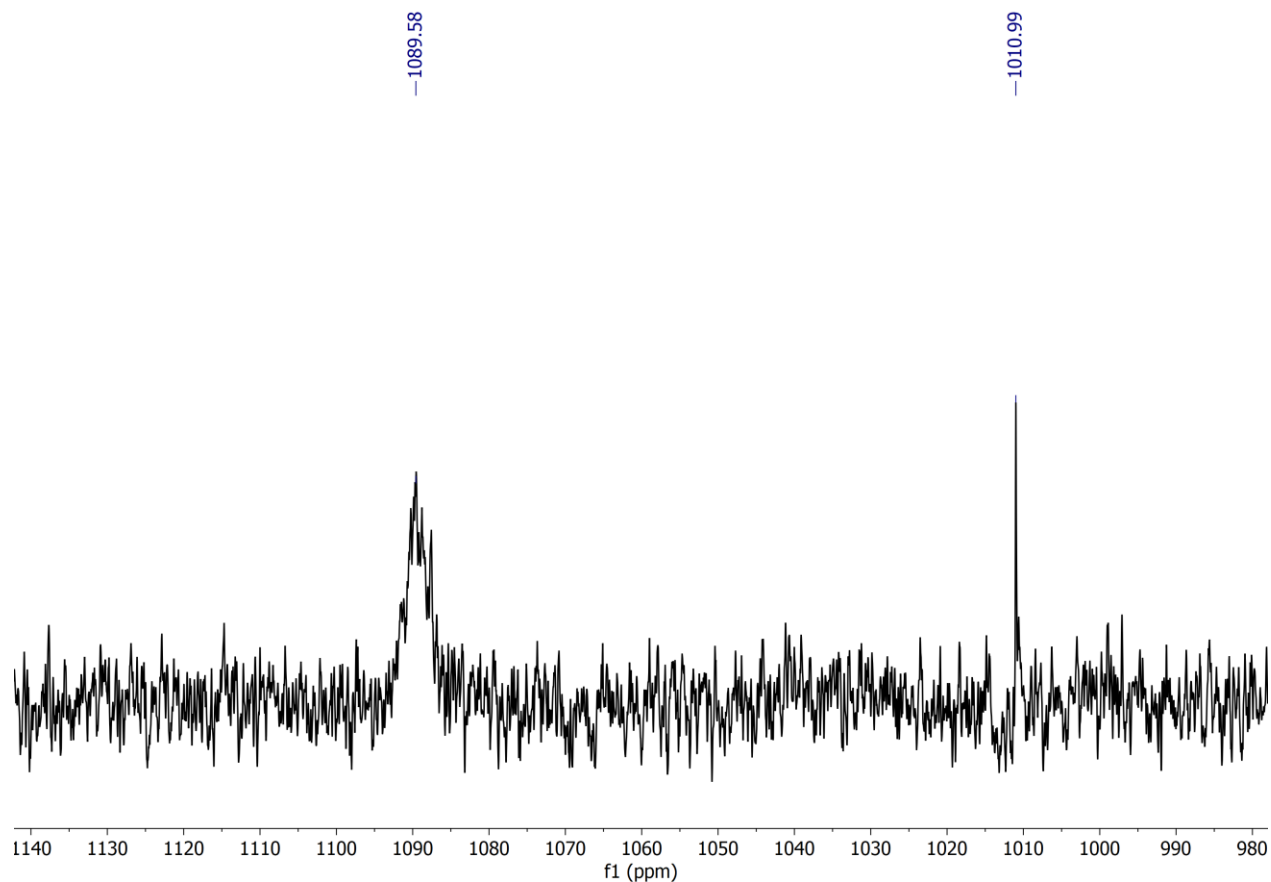

**Figure S4.**  $^{207}\text{Pb}\{^1\text{H}\}$  NMR spectrum (THF- $d_8$ , 83.79 MHz, 300 K) of  $[\text{Mg}_3(\mu_2\text{-Br})_3(\mu_3\text{-Cl})_2(\text{OEt}_2)_6]^+[\text{Pb}(\text{C}_6\text{F}_5)_3]^-$  (**1**). On the basis of the  $^{19}\text{F}$  NMR data (Figures S3 and S6), the very minor resonance at 1011 ppm is assigned to  $\text{Pb}(\text{C}_6\text{F}_5)_4$ , although it does not match the value reported elsewhere ( $-391$  ppm in  $\text{CDCl}_3$ ).<sup>[3]</sup>



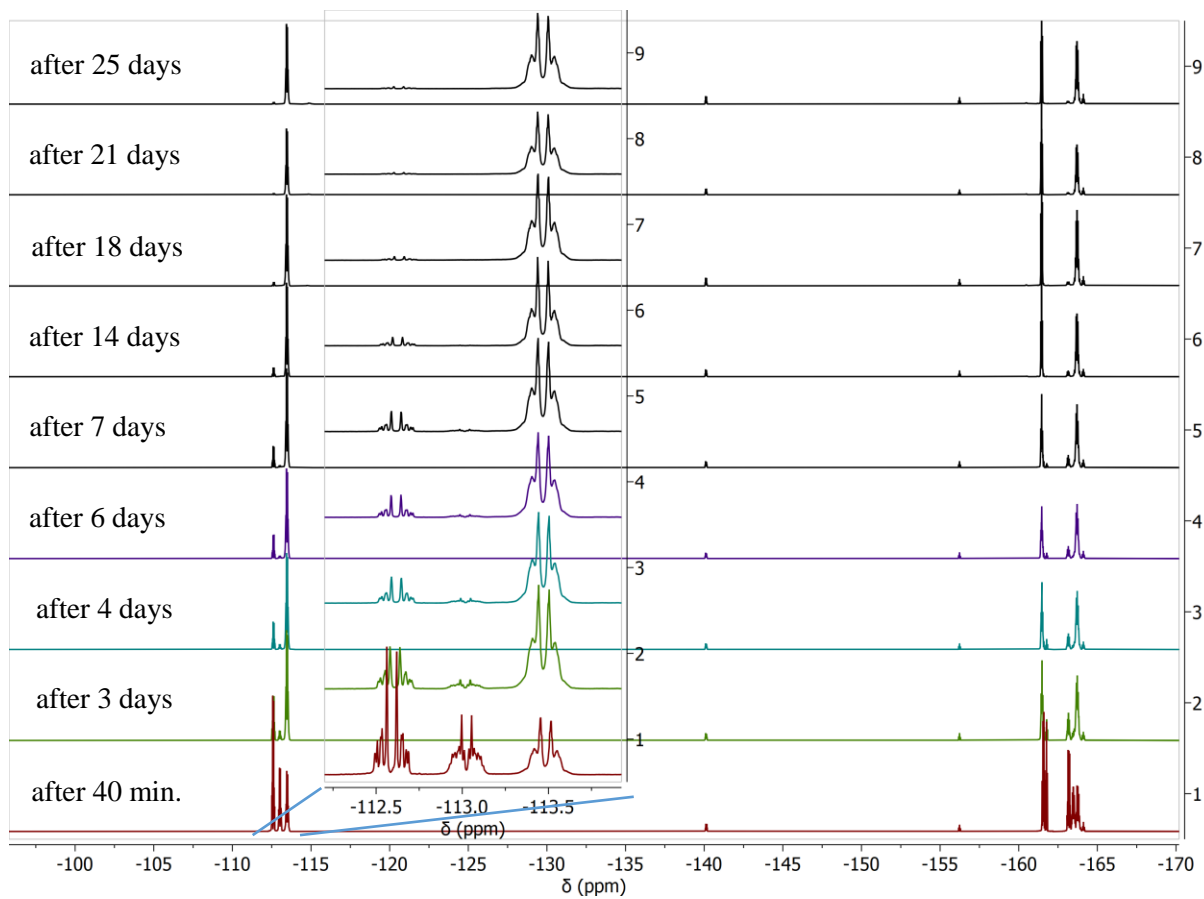

**Figure S5.** Stacked  $^{19}\text{F}$  NMR spectra (THF- $d_8$ , 376.47 MHz, 300 K) of the reaction between  $\text{C}_6\text{F}_5\text{MgBr}$  and  $\text{PbBr}_2$  (2:1 molar ratio) with the formation of  $[\text{Mg}_3(\mu_2\text{-Br})_3(\mu_3\text{-Br})_2(\text{OEt})_6]^+[\text{Pb}(\text{C}_6\text{F}_5)_3]^-$ . It shows slow formation of the title compound within 18-21 days.

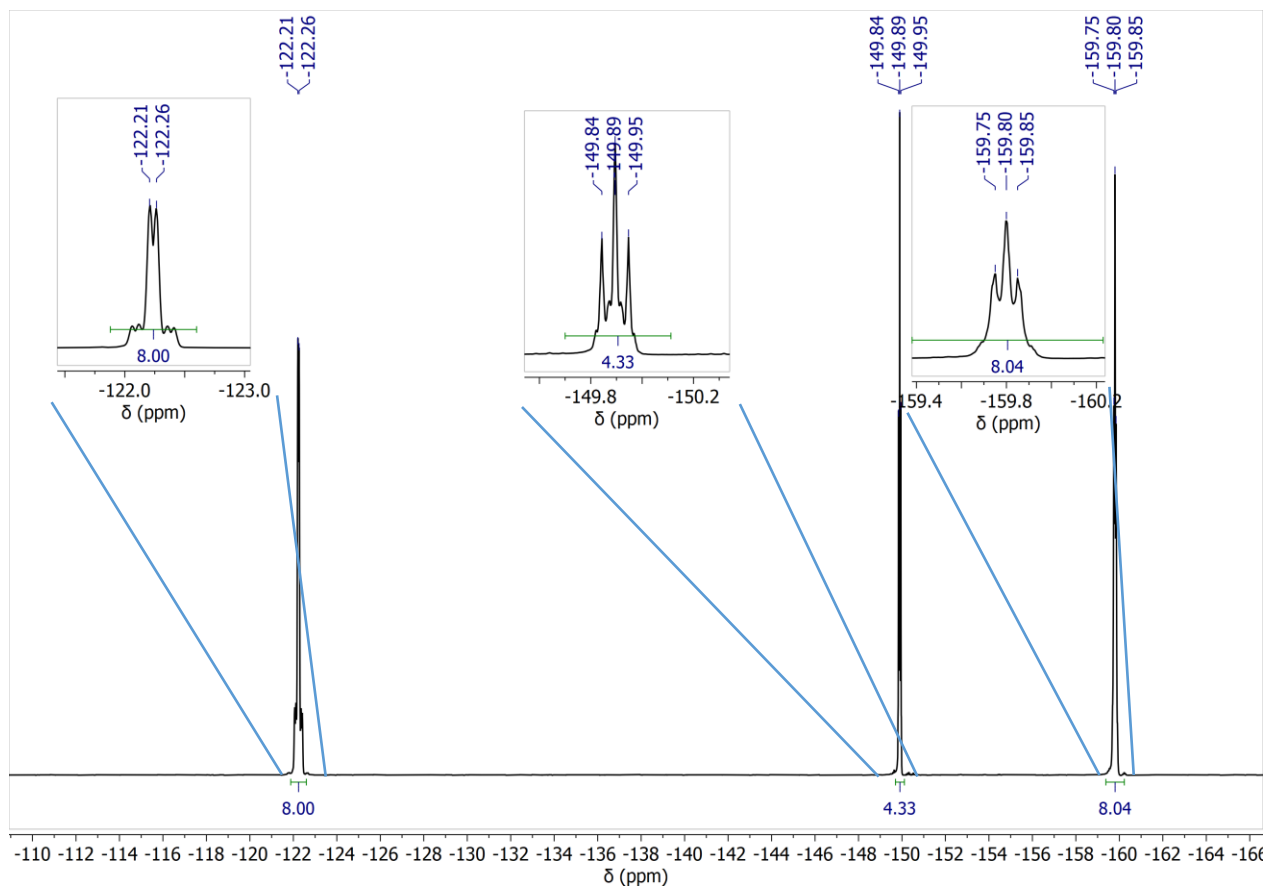

**Figure S6.**  $^{19}\text{F}$  NMR spectrum ( $\text{THF-}d_8$ , 376.47 MHz, 300 K) of crystalline  $[\text{Pb}(\text{C}_6\text{F}_5)_4]$  (crystals identity was also confirmed by XRD).

## Synthesis of $[\text{Pb}(\text{C}_6\text{F}_5)_2(\text{dx})]_\infty$ (2)

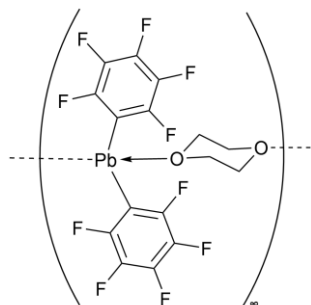

A dark-brown solution of  $\text{C}_6\text{F}_5\text{MgBr}$  in  $\text{Et}_2\text{O}$  (1.098 g, 7.7 mL, 0.53 M, 4.05 mmol) was added dropwise for 15 minutes, to a slurry of  $\text{PbBr}_2$  (0.743 g, 2.02 mmol) in  $\text{Et}_2\text{O}$  (35 mL) at  $-78^\circ\text{C}$ , avoiding light. After 4 h, the reaction mixture reached room temperature and 1 mL of dioxane was added at once, resulting immediately in the formation of a big amount of white precipitate. The reaction mixture was stirred overnight, after which the pale yellow solution was isolated from the white precipitate by cannula filtration, concentrated to incipient crystallization and stored at  $-35^\circ\text{C}$ . Colorless crystals of the title compound were isolated after one day, 0.770 g (60%).

$^1\text{H}$  NMR ( $\text{THF-}d_8$ , 500.13 MHz, 300 K):  $\delta$  3.56 (s, 8H,  $\text{CH}_2$ ) ppm.

$^{13}\text{C}\{^1\text{H}\}$  NMR ( $\text{THF-}d_8$ , 125.77 MHz, 300 K):  $\delta$  180.60 (tm,  $^1J_{\text{F-C}} = 66$  Hz, *ortho-C*), 147.38 (ddm,  $^1J_{\text{F-C}} = 227$  Hz,  $^2J_{\text{F-C}} = 25$  Hz, *para-C*), 140.55 (ddm,  $^1J_{\text{F-C}} = 258$  Hz, *meta-C*), 102.30 (td,  $^2J_{\text{F-C}} = 23$  Hz,  $^3J_{\text{F-C}} = 3$  Hz, *ipso-C*) 67.98 (s,  $\text{CH}_2$ ) ppm.

$^{19}\text{F}$  NMR ( $\text{THF-}d_8$ , 470.52 MHz, 300 K):  $\delta$   $-116.77$  (m, 4F, *orto-C* $_6\text{F}_5$ ),  $-157.89$  (t, 2F,  $^3J_{\text{F-F}} = 19.8$  Hz, *para-C* $_6\text{F}_5$ ),  $-161.54$  (m, 4F, *meta-C* $_6\text{F}_5$ ) ppm.

$^{207}\text{Pb}\{^1\text{H}\}$  NMR ( $\text{THF-}d_8$ , 83.96 MHz, 300 K):  $\delta$  2541 (s) ppm.

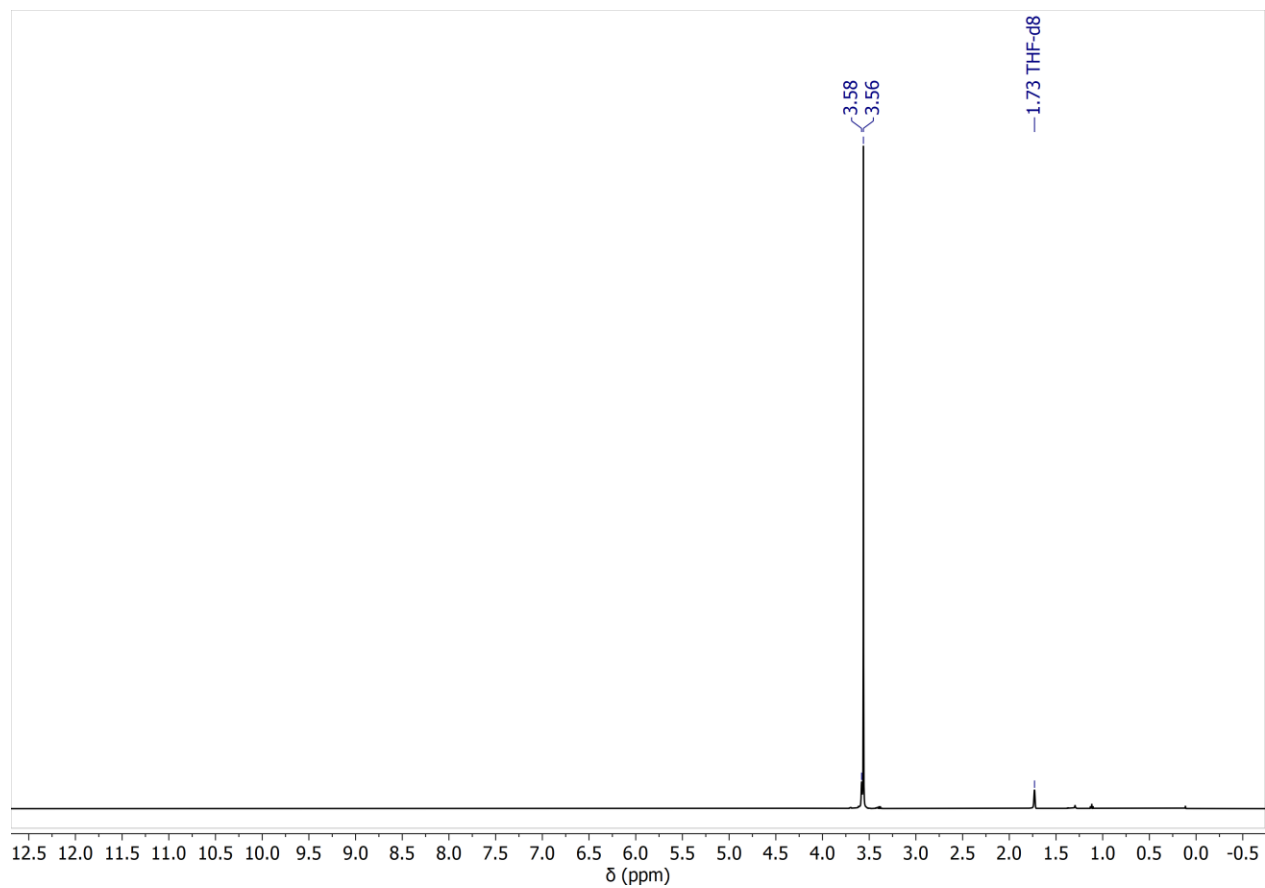

**Figure S7.** <sup>1</sup>H NMR spectrum (THF-*d*<sub>8</sub>, 500.13 MHz, 300 K) of [Pb(C<sub>6</sub>F<sub>5</sub>)<sub>2</sub>(dx)]<sub>∞</sub> (**2**).

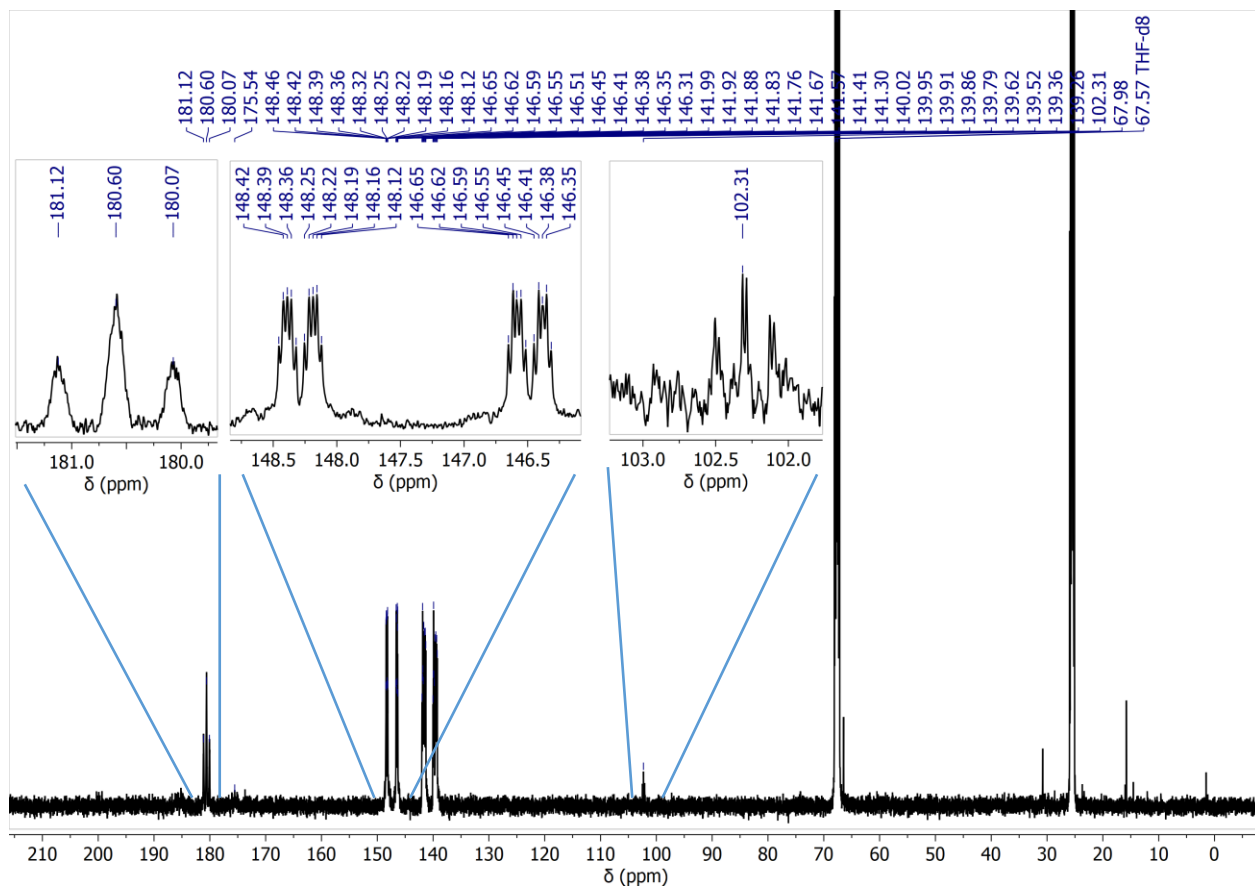

**Figure S8.**  $^{13}\text{C}\{^1\text{H}\}$  NMR spectrum (THF- $d_8$ , 125.77 MHz, 300 K) of  $[\text{Pb}(\text{C}_6\text{F}_5)_2(\text{dx})]_\infty$  (**2**).

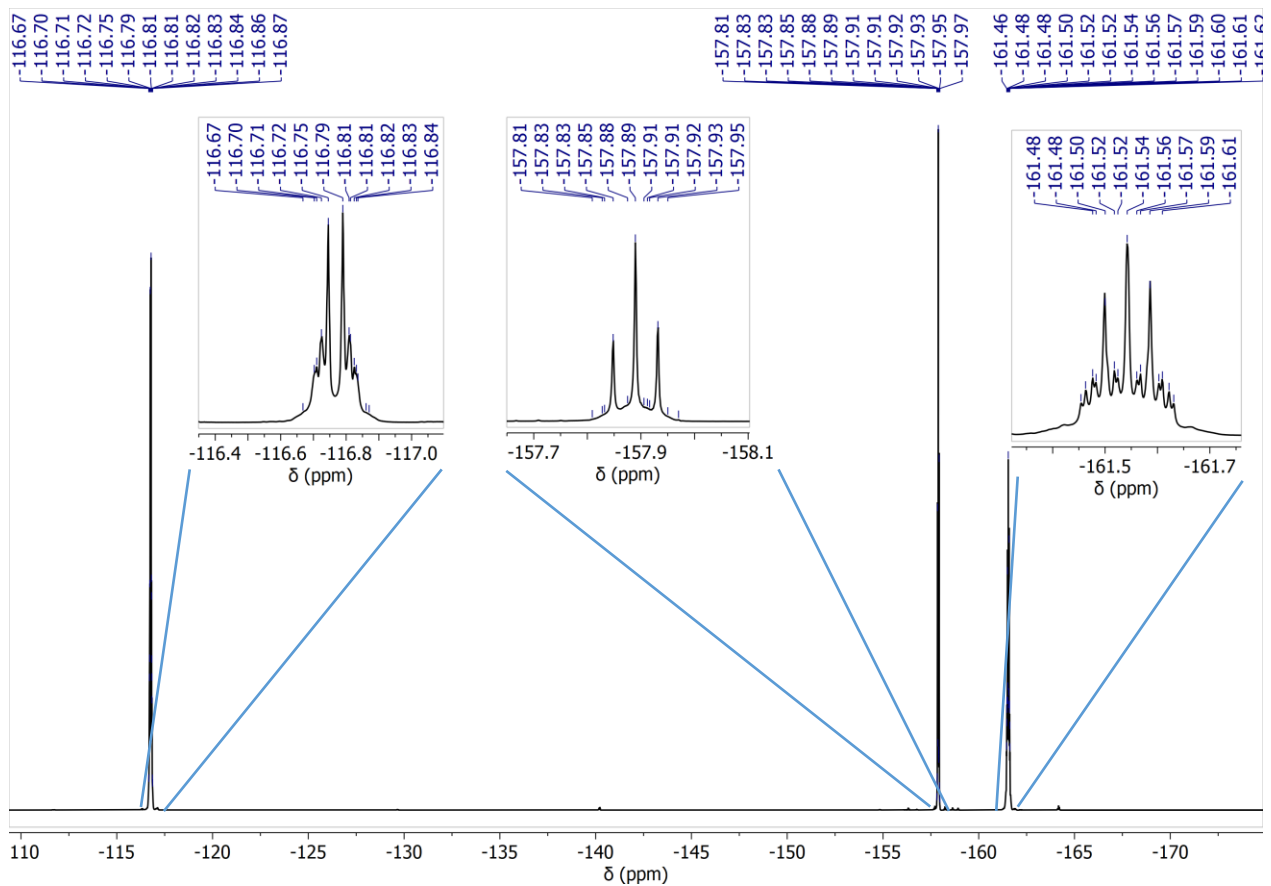

**Figure S9.**  $^{19}\text{F}$  NMR spectrum ( $\text{THF-}d_8$ , 470.52 MHz, 300 K) of  $[\text{Pb}(\text{C}_6\text{F}_5)_2(\text{dx})]_\infty$  (2).

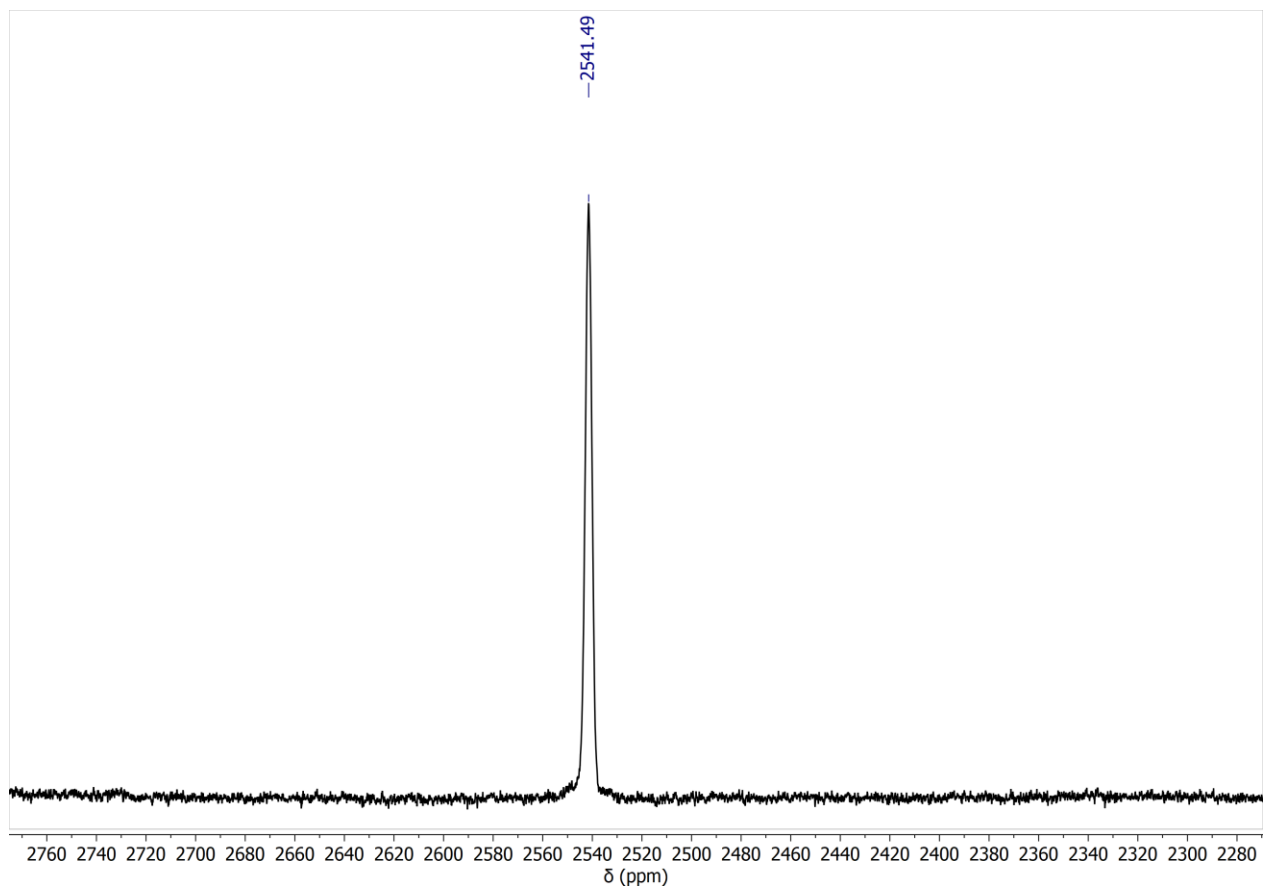

**Figure S10.**  $^{207}\text{Pb}$  NMR spectrum (THF- $d_8$ , 83.92 MHz, 300 K) of  $[\text{Pb}(\text{C}_6\text{F}_5)_2(\text{dx})]_\infty$  (**2**).

### Synthesis of $[(C_6F_5)_3SnSn(C_6F_5)_3]$ (3)

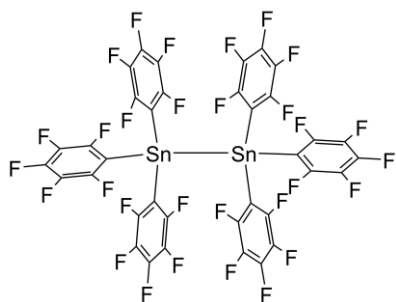

A dark-brown solution of  $C_6F_5MgBr$  in  $Et_2O$  (2.861 g, 19 mL, 0.55 M, 10.55 mmol) was added dropwise for 20 minutes, to a slurry of  $SnCl_2$  (1.000 g, 5.27 mmol) in  $Et_2O$  (20 mL) at  $-78\text{ }^\circ\text{C}$ . After 2 h, the cold bath was removed and the reaction mixture was left under stirring to reach room temperature overnight. The crude was filtered to give a clear brown solution which was concentrated to half of its volume and stored

at  $-35\text{ }^\circ\text{C}$ . pale brown crystals of  $[(C_6F_5)_3SnSn(C_6F_5)_3]$  were isolated after one day, 0.770 g (35%).

$^{13}\text{C}\{^1\text{H}\}$  NMR ( $\text{THF-}d_8$ , 100.62 MHz, 300 K):  $\delta$  148.01 (dm,  $^1J_{\text{F-C}} = 245\text{ Hz}$ , *ortho-C*), 142.62 (dm,  $^1J_{\text{F-C}} = 249\text{ Hz}$ , *para-C*), 137.88 (dm,  $^1J_{\text{F-C}} = 247\text{ Hz}$ , *meta-C*), 121.86 (tm,  $^2J_{\text{F-C}} = 38\text{ Hz}$ , *ipso-C*) ppm.

$^{19}\text{F}$  NMR ( $\text{THF-}d_8$ , 376.44 MHz, 300 K):  $\delta$   $-123.28$  (dd, 12F,  $^3J_{\text{F-F}} = 21.2\text{ Hz}$ ,  $^4J_{\text{F-F}} = 5.0\text{ Hz}$ ,  $^3J_{\text{F-Sn}} = 111\text{ Hz}$ , *ortho-}C\_6F\_5*),  $-157.11$  (t, 6F,  $^3J_{\text{F-F}} = 19.7\text{ Hz}$ , *para-}C\_6F\_5*),  $-163.65$  (m, 12F, *meta-}C\_6F\_5*) ppm.

$^{119}\text{Sn}\{^1\text{H}\}$  NMR ( $\text{THF-}d_8$ , 149.14 MHz, 300 K):  $\delta$  478 (br) ppm.

$^{19}\text{F}$  NMR ( $\text{CDCl}_3$ , 376.47 MHz, 300 K):  $\delta$   $-121.50$  (d, 12F,  $^3J_{\text{F-F}} = 18.0\text{ Hz}$ , *ortho-}C\_6F\_5*),  $-144.91$  (t, 6F,  $^3J_{\text{F-F}} = 20.0\text{ Hz}$ , *para-}C\_6F\_5*),  $-157.02$  (m, 12F, *meta-}C\_6F\_5*) ppm.



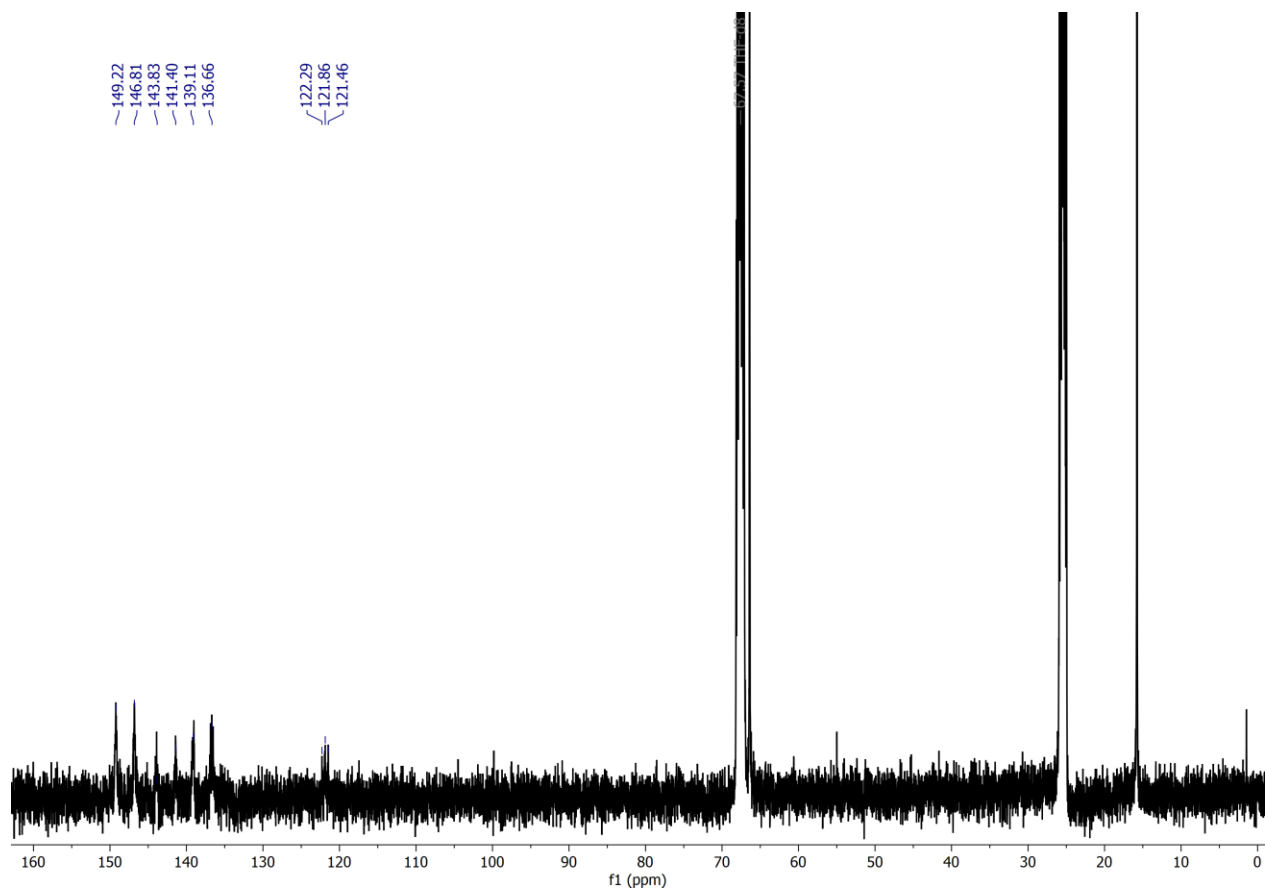

**Figure S11.**  $^{13}\text{C}\{^1\text{H}\}$  NMR spectrum ( $\text{THF-}d_8$ , 300 K, 100.62 MHz) of  $[(\text{C}_6\text{F}_5)_3\text{SnSn}(\text{C}_6\text{F}_5)_3]$  (**3**)

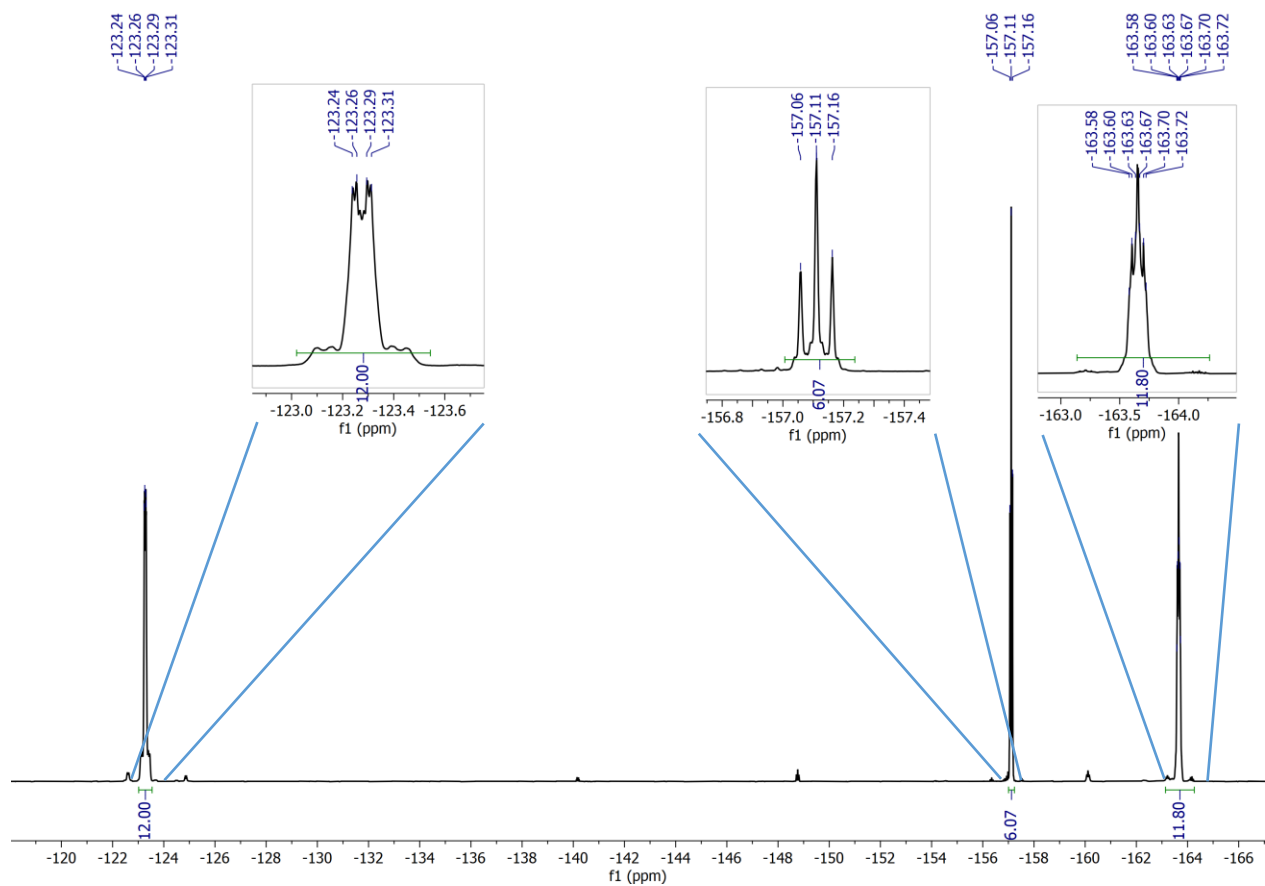

**Figure S12.**  $^{19}\text{F}$  NMR spectrum ( $\text{THF-}d_8$ , 300 K, 376.44 MHz) of  $[(\text{C}_6\text{F}_5)_3\text{SnSn}(\text{C}_6\text{F}_5)_3]$  (**3**).

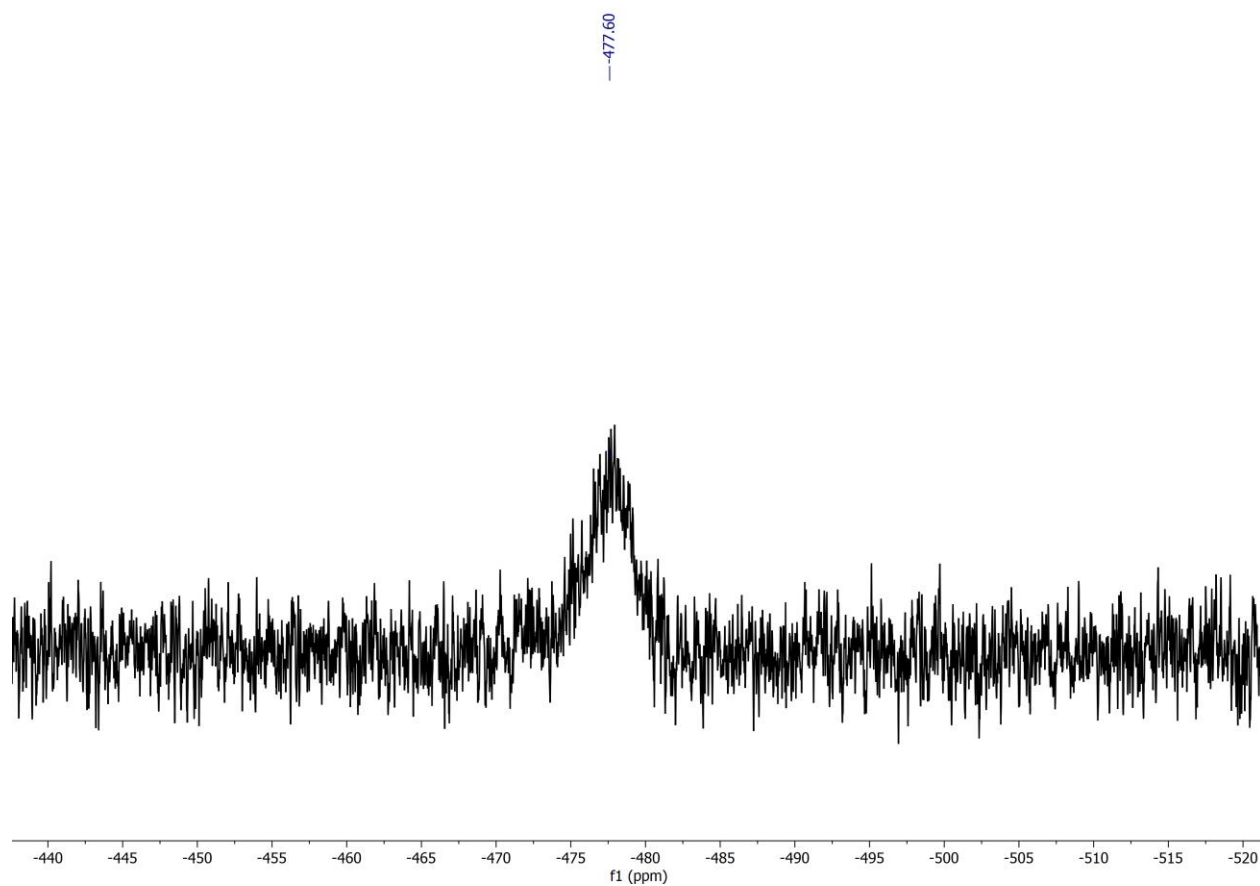

**Figure S13.**  $^{119}\text{Sn}\{^1\text{H}\}$  NMR spectrum (THF- $d_8$ , 149.14 MHz, 300 K) of  $[(\text{C}_6\text{F}_5)_3\text{SnSn}(\text{C}_6\text{F}_5)_3]$  (**3**).

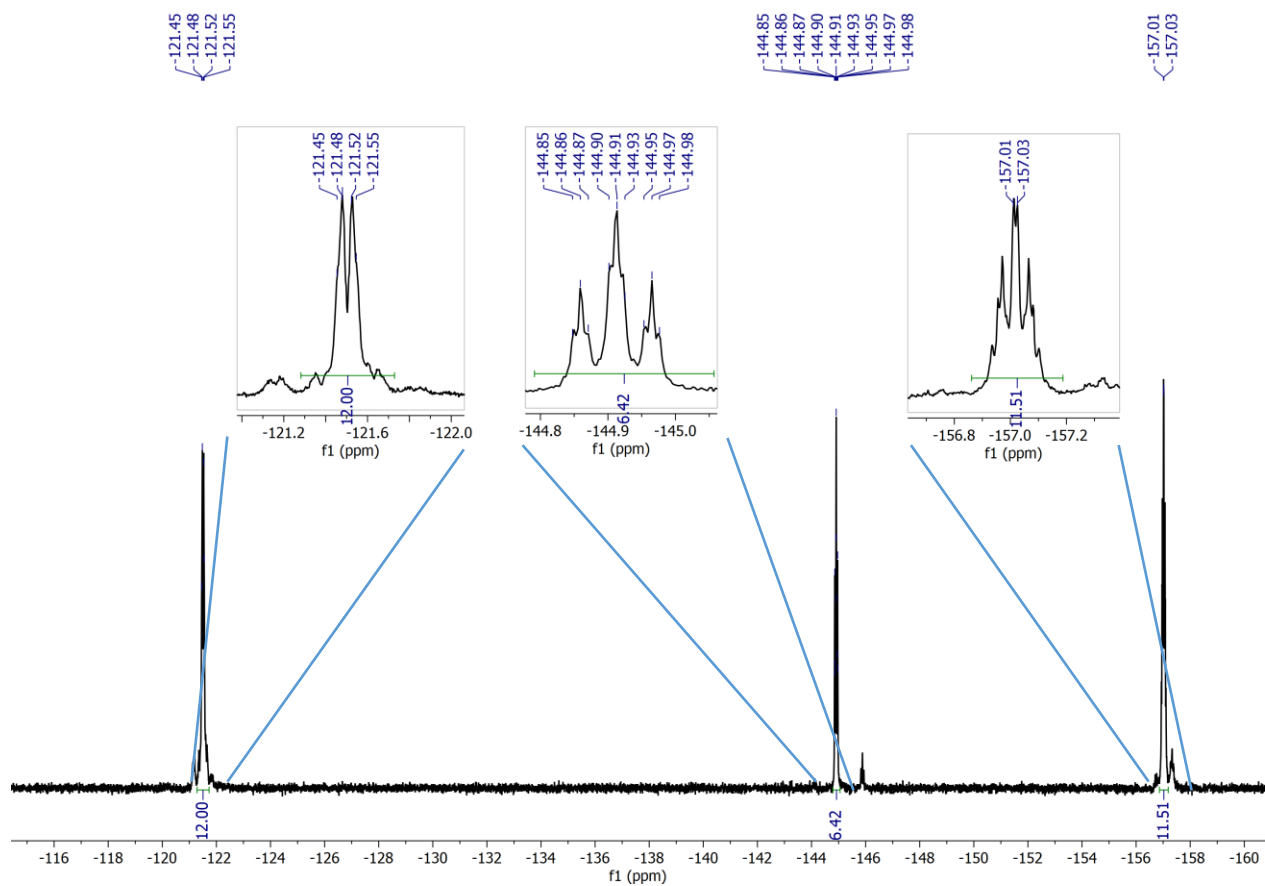

**Figure S14.**  $^{19}\text{F}$  NMR spectrum ( $\text{CDCl}_3$ , 300 K, 376.47 MHz) of  $[(\text{C}_6\text{F}_5)_3\text{SnSn}(\text{C}_6\text{F}_5)_3]$  (**3**).

*Observation.* The  $^{19}\text{F}$  ( $\text{CDCl}_3$ ) chemical shifts found for  $[(\text{C}_6\text{F}_5)_3\text{SnSn}(\text{C}_6\text{F}_5)_3]$  were different that those reported by López-de-Luzuriaga.<sup>[4]</sup>

### X-ray diffraction crystallography

[Mg<sub>3</sub>(μ<sub>2</sub>-Br)<sub>3</sub>(μ<sub>3</sub>-Cl)<sub>2</sub>(OEt<sub>2</sub>)<sub>6</sub>]<sup>+</sup>[Pb(C<sub>6</sub>F<sub>5</sub>)<sub>3</sub>]<sup>-</sup> (**1**): (C<sub>18</sub>F<sub>15</sub>Pb · C<sub>24</sub>H<sub>60</sub>Br<sub>3.44</sub>Cl<sub>1.56</sub>); M = 1554.19. A suitable crystal for X-ray diffraction single crystal experiment (colourless block, dimensions = 0.380 x 0.320 x 0.180 mm) was selected and mounted with a cryoloop on the goniometer head of a D8 Venture (Bruker-AXS) diffractometer equipped with a CMOS-PHOTON70 detector, using Mo-Kα radiation (λ = 0.71073 Å, multilayer monochromator) at T = 168(2) K. Crystal structure has been described in triclinic symmetry and *P* 1 (I.T.#2) centric space group (*R*<sub>int</sub> = 0.0635). Cell parameters have been refined as follows: a = 13.228(3), b = 13.887(3), c = 17.570(4) Å, α = 69.038(8), β = 85.126(6), γ = 85.016(7)°, V = 2997.8(12) Å<sup>3</sup>. Number of formula unit Z is equal to 2 and calculated density d and absorption coefficient μ values are 1.722 g.cm<sup>-3</sup> and 5.293 mm<sup>-1</sup> respectively. Crystal structure was solved by dual-space algorithm using *SHELXT* program,<sup>[5]</sup> and then refined with full-matrix least-squares methods based on F<sup>2</sup> (*SHELXL* program<sup>[6]</sup>). The contribution of the disordered solvents to the calculated structure factors was estimated following the BYPASS algorithm,<sup>[7]</sup> implemented as the SQUEEZE option in PLATON.<sup>[8]</sup> A new data set, free of solvent contribution, was then used in the final refinement. All non-Hydrogen atoms were refined with anisotropic atomic displacement parameters. H atoms were finally included in their calculated positions and treated as riding on their parent atom with constrained thermal parameters. A final refinement on F<sup>2</sup> with 13776 unique intensities and 640 parameters converged at ωR(F<sup>2</sup>) = 0.1394 (R<sub>F</sub> = 0.0564) for 9556 observed reflections with I > 2σ. CCDC number: 2400987.

[Pb(C<sub>6</sub>F<sub>5</sub>)<sub>2</sub>(dx)]<sub>∞</sub> (**2**): (C<sub>16</sub>H<sub>8</sub>F<sub>10</sub>O<sub>2</sub>Pb); M = 629.41. A suitable crystal for X-ray diffraction single crystal experiment (colourless block, dimensions = 0.190 x 0.120 x 0.080 mm) was selected and mounted with a cryoloop on the goniometer head of a D8 Venture (Bruker-AXS) diffractometer equipped with a CMOS-PHOTON70 detector, using Mo- Kα radiation (λ = 0.71073 Å, multilayer monochromator) at T = 150(2) K. Crystal structure has been described in triclinic symmetry and *P* 1 (I.T.#2) centric space group (*R*<sub>int</sub> = 0.0322). Cell parameters have been refined as follows: a = 7.8568(8), b = 7.9859(8), c = 15.6528(15) Å, α = 95.693(3), β = 91.114(4), γ = 115.308(3)°, V = 881.38(15) Å<sup>3</sup>. Number of formula unit Z is equal to 2 and calculated density d and absorption coefficient μ values are 2.372 g.cm<sup>-3</sup> and 9.682 mm<sup>-1</sup> respectively. Crystal structure was solved by dual-space algorithm using *SHELXT* program,<sup>[5]</sup> and then refined with full-matrix least-squares methods based on F<sup>2</sup> (*SHELXL* program<sup>[6]</sup>). All non-Hydrogen atoms were refined with anisotropic atomic displacement parameters. H atoms were finally included in their calculated positions and treated as riding on their parent atom with constrained thermal parameters. A final refinement on F<sup>2</sup> with 3994 unique intensities and 263 parameters converged at ωR(F<sup>2</sup>) = 0.0572 (R<sub>F</sub> = 0.0238) for 3859 observed reflections with I > 2σ. In the CHECKCIF procedure, no A-type and B-type meaningful alerts has remained. CCDC number: 2400988.

[Pb(C<sub>6</sub>F<sub>5</sub>)<sub>4</sub>]: (C<sub>24</sub>F<sub>20</sub>Pb); M = 875.43. A suitable crystal for X-ray diffraction single crystal experiment (colourless block, dimensions = 0.270 x 0.220 x 0.090 mm) was selected and mounted with a cryoloop on the goniometer head of a D8 Venture (Bruker-AXS) diffractometer equipped with a CMOS-PHOTON70 detector, using Mo-K $\alpha$  radiation ( $\lambda = 0.71073 \text{ \AA}$ , multilayer monochromator) at T = 150(2) K. Crystal structure has been described in orthorhombic symmetry and P b c a (I.T.#61) centric space group ( $R_{\text{int}} = 0.0288$ ). Cell parameters have been refined as follows: a = 7.9565(4), b = 17.7225(9), c = 34.0045(17)  $\text{\AA}$ , V = 4794.9(4)  $\text{\AA}^3$ . Number of formula unit Z is equal to 8 and calculated density d and absorption coefficient  $\mu$  values are 2.425 g.cm<sup>-3</sup> and 7.209 mm<sup>-1</sup> respectively. Crystal structure was solved by dual-space algorithm using SHELXT program,<sup>[5]</sup> and then refined with full-matrix least-squares methods based on F<sup>2</sup> (SHELXL program<sup>[6]</sup>). All atoms were refined with anisotropic atomic displacement parameters. A final refinement on F<sup>2</sup> with 5831 unique intensities and 407 parameters converged at  $\omega R(F^2) = 0.1084$  ( $R_F = 0.0326$ ) for 5067 observed reflections with  $I > 2\sigma$ . In the CHECKCIF procedure, no A-type and B-type meaningful alerts has remained. CCDC number: 2400989.

[(C<sub>6</sub>F<sub>5</sub>)<sub>3</sub>SnSn(C<sub>6</sub>F<sub>5</sub>)<sub>3</sub>](dx): (C<sub>36</sub>F<sub>30</sub>Sn<sub>2</sub> · C<sub>4</sub>H<sub>8</sub>O<sub>2</sub>); M = 1327.84. A suitable crystal for X-ray diffraction single crystal experiment (colourless block, dimensions = 0.170 x 0.070 x 0.040 mm) was selected and mounted with a cryoloop on the goniometer head of a D8 Venture (Bruker-AXS) diffractometer equipped with a CMOS-PHOTON70 detector, using Mo-K $\alpha$  radiation ( $\lambda = 0.71073 \text{ \AA}$ , multilayer monochromator) at T = 150(2) K. Crystal structure has been described in triclinic symmetry and P 1 (I.T.#2) centric space group ( $R_{\text{int}} = 0.0298$ ). Cell parameters have been refined as follows: a = 9.9952(10), b = 10.1428(11), c = 10.8362(12)  $\text{\AA}$ ,  $\alpha = 95.488(4)$ ,  $\beta = 95.241(4)$ ,  $\gamma = 112.298(4)^\circ$ , V = 1002.00(19)  $\text{\AA}^3$ . Number of formula unit Z is equal to 1 and calculated density d and absorption coefficient  $\mu$  values are 2.201 g.cm<sup>-3</sup> and 1.427 mm<sup>-1</sup> respectively. Crystal structure was solved by dual-space algorithm using SHELXT program,<sup>[5]</sup> and then refined with full-matrix least-squares methods based on F<sup>2</sup> (SHELXL program<sup>[6]</sup>). All non-Hydrogen atoms were refined with anisotropic atomic displacement parameters. H atoms were finally included in their calculated positions and treated as riding on their parent atom with constrained thermal parameters. A final refinement on F<sup>2</sup> with 4532 unique intensities and 334 parameters converged at  $\omega R(F^2) = 0.0983$  ( $R_F = 0.0421$ ) for 3911 observed reflections with  $I > 2\sigma$ . In the CHECKCIF procedure, no A-type and B-type meaningful alerts has remained. CCDC number: 2400990.

[Mg<sub>2</sub>Br<sub>2</sub>(DMAP)<sub>2</sub>]: (C<sub>14</sub>H<sub>20</sub>Br<sub>2</sub>MgN<sub>4</sub>); M = 428.47. A suitable crystal for X-ray diffraction single crystal experiment (colourless prism, dimensions = 0.070 x 0.040 x 0.030 mm) was selected and mounted with a cryoloop on the goniometer head of a D8 Venture (Bruker-AXS) diffractometer equipped with a CMOS-PHOTON70 detector, using Mo-K $\alpha$  radiation ( $\lambda = 0.71073 \text{ \AA}$ , multilayer monochromator) at T = 150(2) K. Crystal structure has been described in orthorhombic symmetry and P c c n (I.T.#56) centric space group ( $R_{\text{int}} = 0.1237$ ). Cell parameters have been refined as follows: a = 14.220(4), b = 14.478(4), c = 17.924(4)  $\text{\AA}$ , V = 3690.2(17)  $\text{\AA}^3$ . Number of formula unit Z is equal to 8 and calculated density d and absorption coefficient  $\mu$  values are 1.542 g.cm<sup>-3</sup> and 4.426 mm<sup>-1</sup> respectively. Crystal structure was solved by dual-space algorithm using SHELXT program,<sup>[5]</sup> and then refined with full-matrix least-squares methods based on F<sup>2</sup> (SHELXL program<sup>[6]</sup>). All non-Hydrogen atoms were refined with anisotropic atomic displacement parameters. H atoms were finally included in their calculated positions and treated as riding on their parent atom with constrained thermal parameters. A final refinement on F<sup>2</sup> with 4193 unique intensities and 195 parameters converged at  $\omega R(F^2) = 0.1116$  ( $R_F = 0.0586$ ) for 1938 observed reflections with  $I > 2\sigma$ . In the CHECKCIF procedure, no A-type and B-type meaningful alerts has remained. CCDC number: 2400991.

**Table S1.** Crystal data and structure refinement for **1** and **2**.

|                                         | [Mg <sub>3</sub> (μ <sub>2</sub> -Br) <sub>3</sub> (μ <sub>3</sub> -Cl) <sub>2</sub> (OEt <sub>2</sub> ) <sub>6</sub> ] <sup>+</sup><br>[Pb(C <sub>6</sub> F <sub>5</sub> ) <sub>3</sub> ] <sup>-</sup> ( <b>1</b> ) | [Pb(C <sub>6</sub> F <sub>5</sub> ) <sub>2</sub> (dx)] <sub>∞</sub><br>( <b>2</b> ) |
|-----------------------------------------|----------------------------------------------------------------------------------------------------------------------------------------------------------------------------------------------------------------------|-------------------------------------------------------------------------------------|
| CCDC number                             | 2400987                                                                                                                                                                                                              | 2400988                                                                             |
| Formula                                 | C <sub>42</sub> H <sub>58</sub> Br <sub>3.44</sub> Cl <sub>1.56</sub> F <sub>15</sub> Mg <sub>3</sub> O <sub>6</sub> Pb                                                                                              | C <sub>16</sub> H <sub>8</sub> F <sub>10</sub> O <sub>2</sub> Pb                    |
| Mol. wt [g/mol]                         | 1554.19                                                                                                                                                                                                              | 629.41                                                                              |
| Crystal system                          | triclinic                                                                                                                                                                                                            | triclinic                                                                           |
| Space group                             | <i>P</i> -1                                                                                                                                                                                                          | <i>P</i> -1                                                                         |
| a [Å]                                   | 13.228(3)                                                                                                                                                                                                            | 7.8568(8)                                                                           |
| b [Å]                                   | 13.887(3)                                                                                                                                                                                                            | 7.9859(8)                                                                           |
| c [Å]                                   | 17.570(4)                                                                                                                                                                                                            | 15.6258(15)                                                                         |
| α [°]                                   | 69.038(8)                                                                                                                                                                                                            | 95.693(3)                                                                           |
| β [°]                                   | 85.126(6)                                                                                                                                                                                                            | 91.114(4)                                                                           |
| γ [°]                                   | 85.016(7)                                                                                                                                                                                                            | 115.308(3)                                                                          |
| V [Å <sup>3</sup> ]                     | 2997.8(12)                                                                                                                                                                                                           | 881.38(15)                                                                          |
| Z                                       | 2                                                                                                                                                                                                                    | 2                                                                                   |
| Density (g cm <sup>-3</sup> )           | 1.722                                                                                                                                                                                                                | 2.372                                                                               |
| Abs. coeff., (mm <sup>-1</sup> )        | 5.293                                                                                                                                                                                                                | 9.682                                                                               |
| F(000)                                  | 1516                                                                                                                                                                                                                 | 584                                                                                 |
| Crystal size, mm                        | 0.380 × 0.320 × 0.180                                                                                                                                                                                                | 0.190 × 0.120 × 0.080                                                               |
| θ range [°]                             | 2.041 to 27.6183                                                                                                                                                                                                     | 2.622 to 27.501                                                                     |
| Limiting indices                        | -17 < h < 17<br>-18 < k < 17<br>-22 < l < 22                                                                                                                                                                         | -10 < h < 10<br>-10 < k < 10<br>-20 < l < 18                                        |
| R(int)                                  | 0.0635                                                                                                                                                                                                               | 0.0322                                                                              |
| Reflections collected                   | 44671 / 13776                                                                                                                                                                                                        | 10064 / 3994                                                                        |
| Refl. Unique [I > 2σ (I)]               | 9556                                                                                                                                                                                                                 | 3859                                                                                |
| Completeness to θ                       | 0.989                                                                                                                                                                                                                | 0.985                                                                               |
| Data/ restraints/ param.                | 13776 / 0 / 640                                                                                                                                                                                                      | 3994 / 0 / 263                                                                      |
| Goodness-of-fit                         | 1.032                                                                                                                                                                                                                | 1.036                                                                               |
| R <sub>1</sub> [I > 2σ (I)] (all data)  | 0.0564 (0.0957)                                                                                                                                                                                                      | 0.0238 (0.0252)                                                                     |
| wR <sub>2</sub> [I > 2σ (I)] (all data) | 0.1394 (0.1594)                                                                                                                                                                                                      | 0.0572 (0.0578)                                                                     |
| Largest diff. [e Å <sup>-3</sup> ]      | 1.753 and -2.203                                                                                                                                                                                                     | 1.806 and -1.857                                                                    |



**Table S2.** Crystal data and structure refinement for [Pb(C<sub>6</sub>F<sub>5</sub>)<sub>4</sub>], [(C<sub>6</sub>F<sub>5</sub>)<sub>3</sub>SnSn(C<sub>6</sub>F<sub>5</sub>)<sub>3</sub>]·(dx) · (dx) and [MgBr<sub>2</sub>(DMAP)<sub>2</sub>].

|                                         | [Pb(C <sub>6</sub> F <sub>5</sub> ) <sub>4</sub> ] | [(C <sub>6</sub> F <sub>5</sub> ) <sub>3</sub> SnSn(C <sub>6</sub> F <sub>5</sub> ) <sub>3</sub> ]·(dx) | [MgBr <sub>2</sub> (DMAP) <sub>2</sub> ]                         |
|-----------------------------------------|----------------------------------------------------|---------------------------------------------------------------------------------------------------------|------------------------------------------------------------------|
| CCDC number                             | 2400989                                            | 2400990                                                                                                 | 2400991                                                          |
| Formula                                 | C <sub>24</sub> F <sub>20</sub> Pb                 | C <sub>40</sub> H <sub>8</sub> F <sub>30</sub> O <sub>2</sub> Sn <sub>2</sub>                           | C <sub>14</sub> H <sub>20</sub> Br <sub>2</sub> MgN <sub>4</sub> |
| Mol. wt [g/mol]                         | 875.43                                             | 1327.84                                                                                                 | 428.47                                                           |
| Crystal system                          | orthorhombic                                       | triclinic                                                                                               | orthorhombic                                                     |
| Space group                             | <i>P b c a</i>                                     | <i>P</i> -1                                                                                             | <i>P c c n</i>                                                   |
| a [Å]                                   | 7.9565(4)                                          | 9.9952(10)                                                                                              | 14.220(4)                                                        |
| b [Å]                                   | 17.7225(9)                                         | 10.1428(11)                                                                                             | 14.478(4)                                                        |
| c [Å]                                   | 34.0045(17)                                        | 10.8362(12)                                                                                             | 17.924(4)                                                        |
| α [°]                                   | 90                                                 | 95.488(4)                                                                                               | 90                                                               |
| β [°]                                   | 90                                                 | 95.241(4)                                                                                               | 90                                                               |
| γ [°]                                   | 90                                                 | 112.298(4)                                                                                              | 90                                                               |
| V [Å <sup>3</sup> ]                     | 4794.9(4)                                          | 1002.00(19)                                                                                             | 3690.2(17)                                                       |
| Z                                       | 8                                                  | 1                                                                                                       | 8                                                                |
| Density (g cm <sup>-3</sup> )           | 2.425                                              | 2.201                                                                                                   | 1.542                                                            |
| Abs. coeff., (mm <sup>-1</sup> )        | 7.209                                              | 1.427                                                                                                   | 4.426                                                            |
| F(000)                                  | 3248                                               | 634                                                                                                     | 1712                                                             |
| Crystal size, mm                        | 0.270 × 0.220 ×                                    | 0.170 × 0.070 × 0.040                                                                                   | 0.070 × 0.040 ×                                                  |
| θ range [°]                             | 2.133 to 27.503                                    | 2.436 to 27.513                                                                                         | 2.007 to 27.479                                                  |
| Limiting indices                        | -7 < h < 10<br>-23 < k < 23<br>-44 < l < 44        | -12 < h < 11<br>-13 < k < 13<br>-14 < l < 14                                                            | -18 < h < 15<br>-18 < k < 18<br>-22 < l < 20                     |
| R(int)                                  | 0.0288                                             | 0.0298                                                                                                  | 0.1237                                                           |
| Reflections collected                   | 38223 / 5831                                       | 10571 / 4532                                                                                            | 13800 / 4193                                                     |
| Refl. Unique [I > 2σ (I)]               | 5067                                               | 3911                                                                                                    | 1938                                                             |
| Completeness to θ                       | 0.999                                              | 0.984                                                                                                   | 0.988                                                            |
| Data/ restraints/ param.                | 5831 / 0 / 407                                     | 4532 / 0 / 334                                                                                          | 4193 / 0 / 195                                                   |
| Goodness-of-fit                         | 1.440                                              | 1.043                                                                                                   | 0.978                                                            |
| R <sub>1</sub> [I > 2σ (I)] (all data)  | 0.0326 (0.0386)                                    | 0.0421 (0.0532)                                                                                         | 0.0586 (0.1598)                                                  |
| wR <sub>2</sub> [I > 2σ (I)] (all data) | 0.1084 (0.1116)                                    | 0.0983 (0.1095)                                                                                         | 0.1116 (0.1422)                                                  |
| Largest diff. [e Å <sup>-3</sup> ]      | 3.860 and -5.818                                   | 2.298 and -1.676                                                                                        | 0.629 to -0.520                                                  |

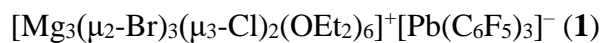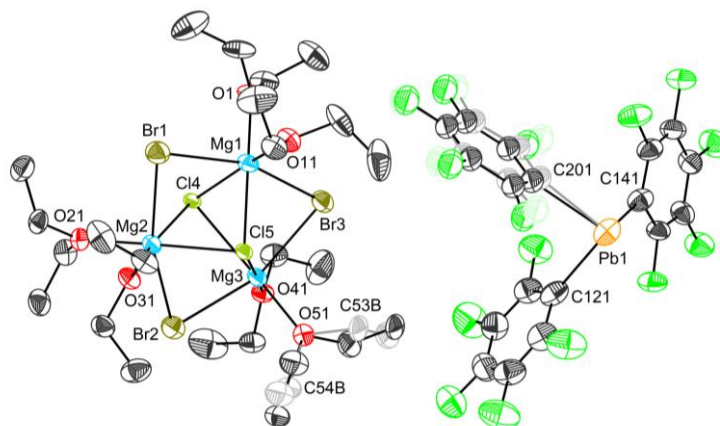

**Figure S15.** ORTEP representation of the molecular solid-state structure of **1**. Ellipsoids at the 50% probability level. H atoms omitted for clarity.

**Table S3.** Selected interatomic distances and bond angles of **1**.

| Interatomic distances (Å) |          |          |           | Bond angles (°) |          |
|---------------------------|----------|----------|-----------|-----------------|----------|
| Mg1–O1                    | 2.038(5) | Pb1–C201 | 2.291(18) | C201–Pb1–C121   | 89.2(6)  |
| Mg1–O11                   | 2.059(5) | Pb1–C121 | 2.341(9)  | C201–Pb1–C141   | 95.6(7)  |
| Mg1–Cl5                   | 2.524(3) | Pb1–C141 | 2.370(8)  | C121–Pb1–C141   | 97.3(3)  |
| Mg1–Br1                   | 2.657(2) | Pb1–C101 | 2.415(9)  | C121–Pb1–C101   | 86.0(5)  |
| Mg1–Br3                   | 2.663(2) |          |           | C141–Pb1–C101   | 100.0(6) |
| Mg1–Cl4                   | 2.683(2) |          |           |                 |          |
| Mg1–Mg2                   | 3.326(3) |          |           |                 |          |
| Mg1–Mg3                   | 3.388(3) |          |           |                 |          |
| Mg2–O31                   | 2.049(5) |          |           |                 |          |
| Mg2–O21                   | 2.054(5) |          |           |                 |          |
| Mg2–Cl5                   | 2.589(3) |          |           |                 |          |
| Mg2–Br2                   | 2.610(2) |          |           |                 |          |
| Mg2–Cl4                   | 2.620(3) |          |           |                 |          |
| Mg2–Br1                   | 2.639(2) |          |           |                 |          |
| Mg2–Mg3                   | 3.332(3) |          |           |                 |          |
| Mg3–O41                   | 2.040(5) |          |           |                 |          |
| Mg3–O51                   | 2.056(5) |          |           |                 |          |
| Mg3–Cl5                   | 2.579(3) |          |           |                 |          |
| Mg3–Br2                   | 2.608(2) |          |           |                 |          |
| Mg3–Br3                   | 2.649(2) |          |           |                 |          |
| Mg3–Cl4                   | 2.697(2) |          |           |                 |          |

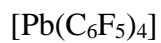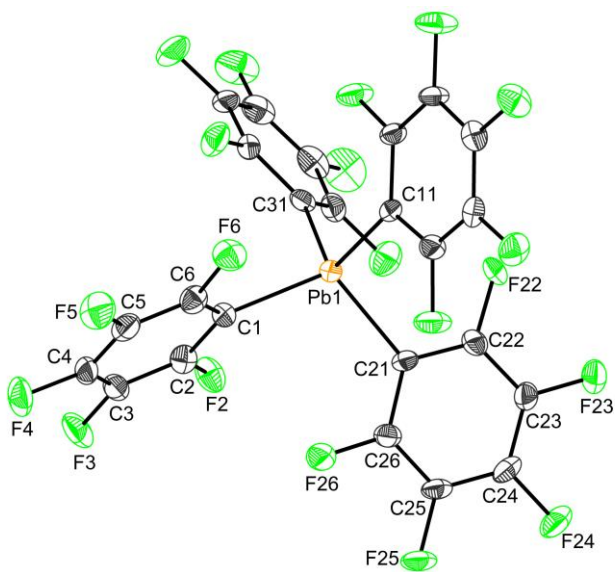

**Figure S16.** ORTEP representation of the new polymorph structure of [Pb(C<sub>6</sub>F<sub>5</sub>)<sub>4</sub>]. Ellipsoids at the 50% probability level. Selected interatomic distances (Å): Pb1–C21 = 2.187(4), Pb1–C1 = 2.193(4), Pb1–C31 = 2.193(4), Pb1–C11 = 2.200(4); and bond angles (°): C21–Pb1–C1 = 110.80(16), C21–Pb1–C31 = 111.50(15), C1–Pb1–C31 = 104.08(16), C21–Pb1–C11 = 104.86(15), C1–Pb1–C11 = 113.51(15), C31–Pb1–C11 = 112.26(15).

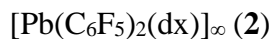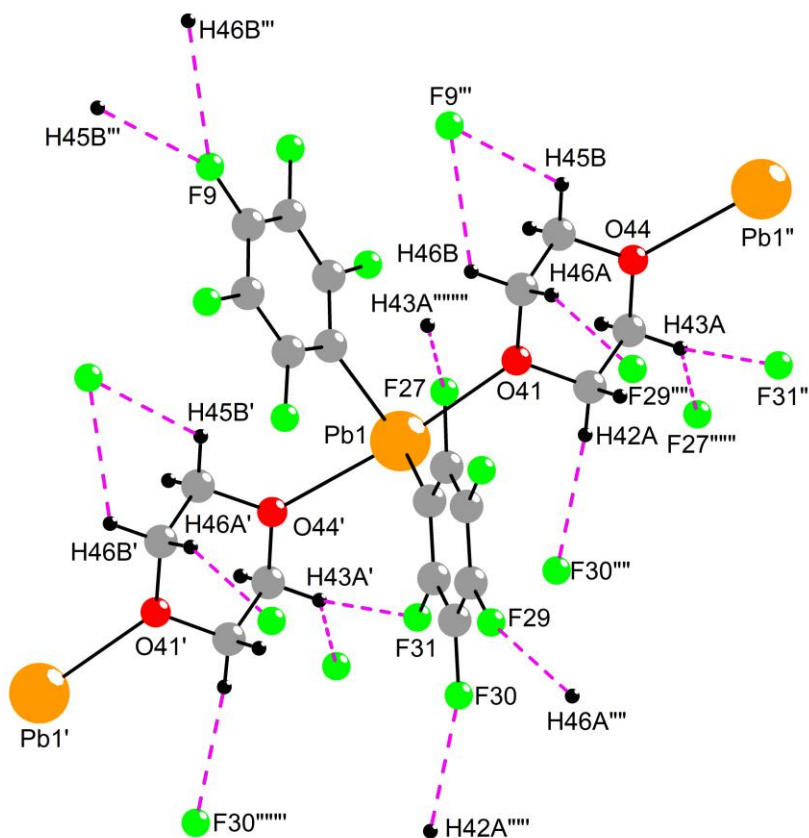

**Figure S17.** Intermolecular C–H···F contacts in the crystal of **2**. [symmetry equivalent atoms ( $-I+x, y, z$ ), ( $I+x, y, z$ ), ( $I-x, I-y, -z$ ), ( $I-x, I-y, I-z$ ), ( $-x, -y, I-z$ ), ( $x, -I+y, z$ ), ( $-I-x, -y, I-z$ ), and ( $x, I+y, z$ ) are given by ', ", "'", '"', ''', '''', ''''', '''''' and '''''''' respectively].

$$\sum r_{\text{vdW}}(\text{F,H}) = 2.66 \text{ \AA}^{[8]}$$

|                           |                   |        |
|---------------------------|-------------------|--------|
| Intermolecular distances: | F9···H45B'''      | 2.50 Å |
|                           | F9···H46B'''      | 2.65 Å |
|                           | F27···H43'''''''' | 2.63 Å |
|                           | F29···H46''''     | 2.50 Å |
|                           | F30···H42A''''    | 2.51 Å |
|                           | F31···H43A'       | 2.58 Å |

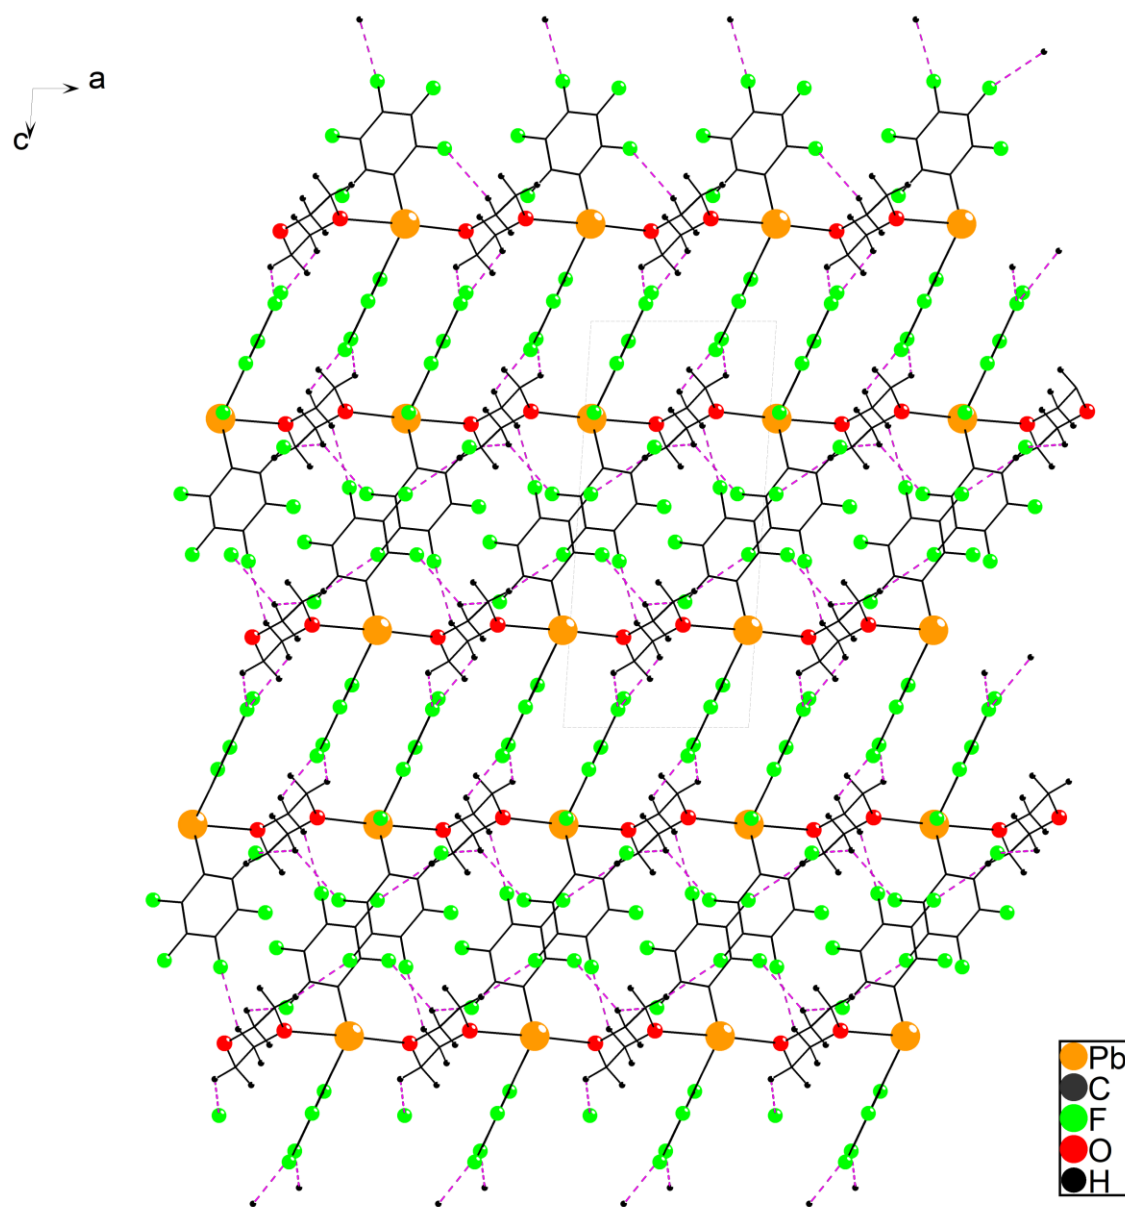

**Figure S18.** View along *b* axis of the polymer structure of **2**, showing parallel chain-like polymers connected via multiple C-H...F interactions.

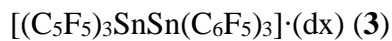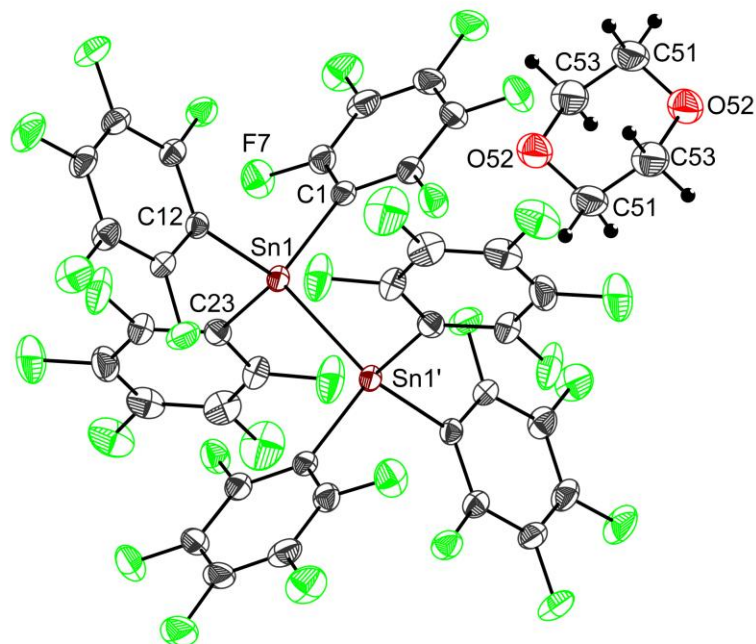

**Figure S19.** ORTEP representation of the molecular solid-state structure of  $[(C_5F_5)_3SnSn(C_6F_5)_3] \cdot (dx)$  (**3**). Ellipsoids at the 50% probability level. Selected interatomic distances (Å): Sn1–C1 = 2.147(4), Sn1–C23 = 2.132(4), Sn1–C12 = 2.152(4), Sn1–Sn1' = 2.7855(6); and bond angles (°): C1–Sn1–C12 = 108.51(16), C1–Sn1–C23 = 105.82(17), C1–Sn1–Sn1' = 110.27(11), C12–Sn1–C23 = 106.89(16), C12–Sn1–Sn1' = 113.38(11), C23–Sn1–Sn1' = 111.62(12).

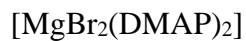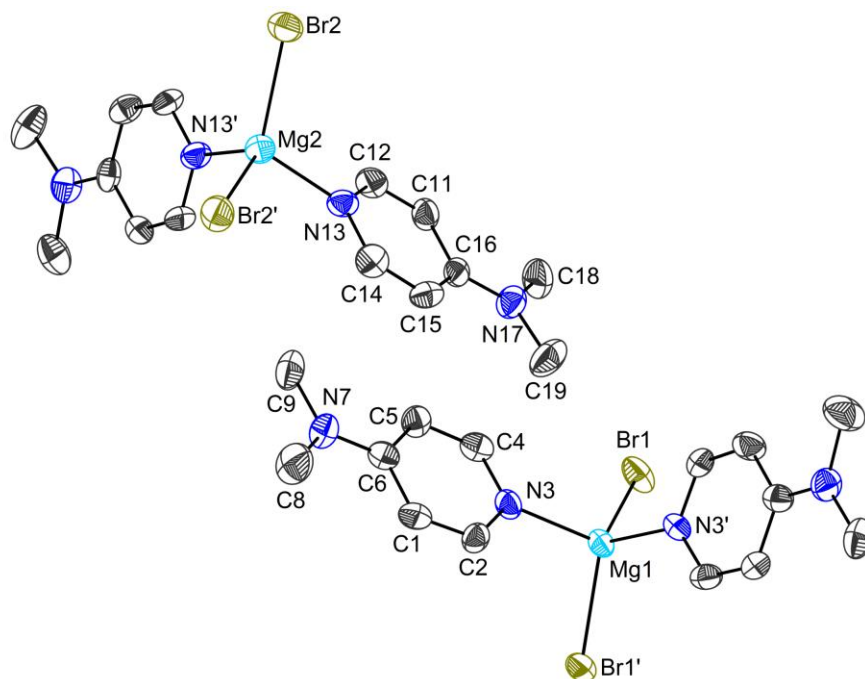

**Figure S20.** ORTEP representation of the molecular solid-state structure of [MgBr<sub>2</sub>(DMAP)<sub>2</sub>]. Ellipsoids at the 50% probability level. Hydrogen atoms omitted for clarity.

**Table S4.** Selected interatomic distances (Å) and bond angles (°) of [MgBr<sub>2</sub>(DMAP)<sub>2</sub>]

|              |            |              |            |
|--------------|------------|--------------|------------|
| Mg1–Br1      | 2.4490(16) | Mg2–Br2      | 2.4363(18) |
| Mg1–N3       | 2.087(5)   | Mg2–N13      | 2.068(6)   |
| N3–Mg1–Br1   | 109.56(15) | N13–Mg2–Br2  | 112.93(15) |
| N3–Mg1–Br1'  | 104.69(15) | N13–Mg2–Br2' | 106.97(15) |
| N3–Mg1–N3'   | 108.3(3)   | N13–Mg2–N13' | 98.2(3)    |
| Br1–Mg1–Br1' | 119.70(12) | Br2–Mg2–Br2' | 117.26(13) |

## References

- 1 T. Heidemann, S. Mathur, *Eur. J. Inorg. Chem.*, 2014, 506.
- 2 B. Wrakmeyer, *Annu. Rep. NMR Spectrosc.*, 1985, **16**, 73.
- 3 T. M. Klapötke, B. Krumm, M. Niemitz, K. Polborn and C. M. Rienäcker, *J. Fluor. Chem.*, 2000, **104**, 129.
- 4 R. V. Bojan, J. M. López-de-Luzuriaga, M. Monge and M. E. Olmos, *J. Organomet. Chem.*, 2010, **695**, 2385.
- 5 G. M. Sheldrick, *Acta Crystallogr., Sect. A: Found. Adv.*, 2015, **71**, 3.
- 6 G. M. Sheldrick, *Acta Crystallogr., Sect. C: Struct. Chem.*, 2015, **71**, 3.
- 7 P. van der Sluis and A. L. Spek, *Acta Crystallogr., Sect. A: Found. Adv.*, 1990, **46**, 194.
- 8 A. L. Spek, *J. Appl. Cryst.*, 2003, **36**, 7.
- 9 S. Alvarez, *Dalton Trans.*, 2013, **42**, 8617.
